# Supplementary material for: Feature-Assisted Machine Learning for Predicting Band Gaps of Binary Semiconductors
Source: MDPI journal article supplement (doi:10.3390/nano14050445), 2024-02-28
Supplement: s1 [file s1]

Supporting Information for

# Feature-Assisted Machine Learning for Predicting Band Gaps of Binary Semiconductors

Sitong Huo, Shuqing Zhang \*, Qilin Wu and Xinping Zhang \*

Institute of Information Photonics Technology, School of Physics and Optoelectronic Engineering, Beijing University of Technology, Beijing 100124, China; hst6110@emails.bjut.edu.cn (S.H.); qlwu2001@emails.bjut.edu.cn (Q.W.)

\* Correspondence: zhangsq@bjut.edu.cn (S.Z.); zhangxinping@bjut.edu.cn (X.Z.)

In this work, we utilized six supervised learning algorithms, LASSO, Kernel Ridge Regression (KRR), Support Vector regression (SVR), Decision Trees (DT), Random Forests (RF), and GBDT. All these models are implemented in python 3.8 environment and training and optimization is done based on Scikit-learn<sup>[1]</sup> framework. Our machine learning models employed three-fold cross-validation. The specific model parameters are given in Table S1.

**Table S1.** Parameters of traditional machine learning models.

| Model                       | Main parameters                                     |
|-----------------------------|-----------------------------------------------------|
| Lasso                       | selection = 'cyclic', alpha = 0.04, max_iter = 1200 |
| Kernel Ridge                | kernel = 'rbf'                                      |
| Support Vector Regression   | kernel = 'rbf', gamma = 'scale'                     |
| Decision Tree               | Splitter = "best", criterion = "mse"                |
| Random Forest               | max_depth = 30                                      |
| Gradient Boosting Regressor | n_estimators = 358, learning_rate = 0.1             |

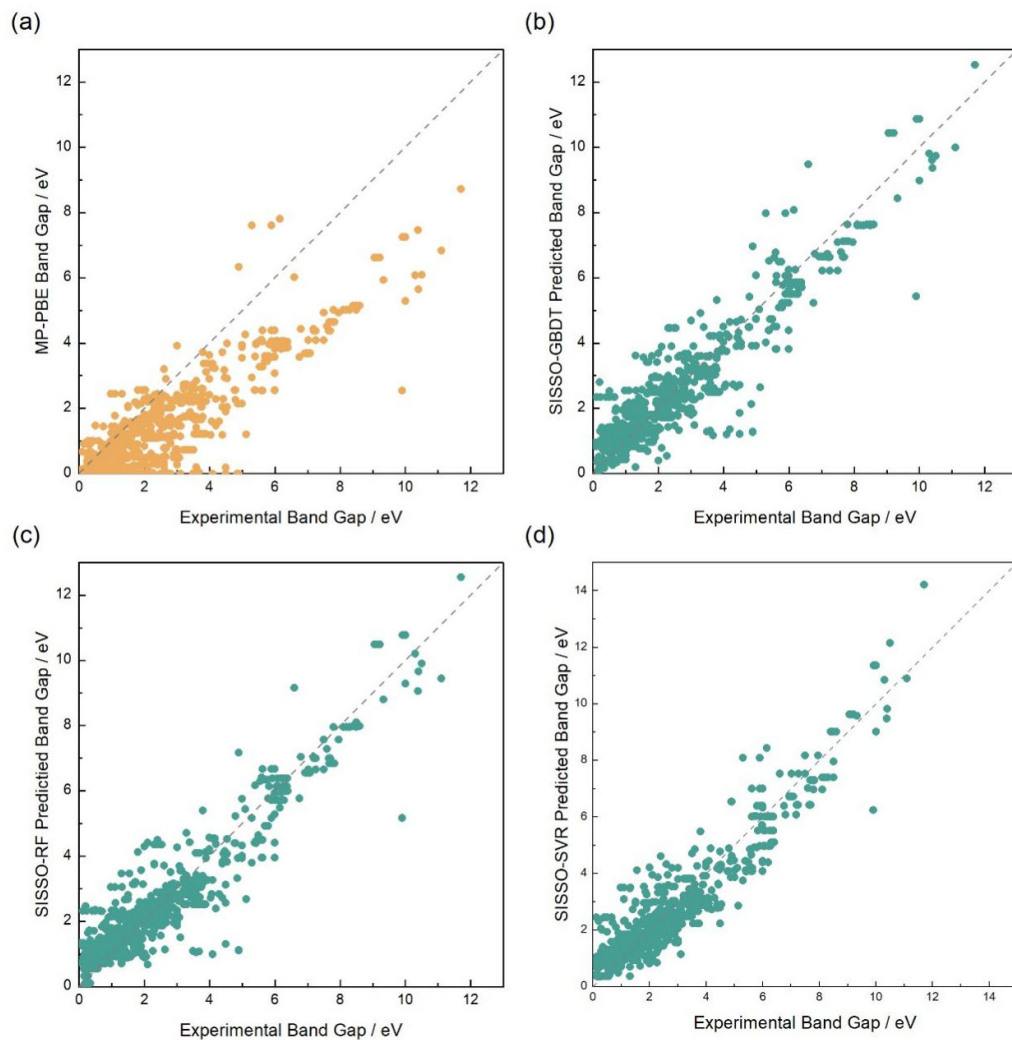

**Figure S1.** (a) Comparison of experimental band gap values with PBE-calculated band gaps from the Materials Project database. (b–d) Comparison of band gap values predicted by three stable SISSO 2D models. Using the top 11 from SVR as inputs for the SISSO-SVR method (b), the top 7 from RF as inputs for the SISSO-RF method (c), and the top 4 features from GBDT as inputs for the SISSO-GBDT method (d).

**Table S2.** Predicted band gap values for all stable binary semiconductors in the Materials Project database. The band gap values from left to right are the PBE calculated values and the predicted band gap values of the stable SISSO model based on GBDT, RF and SVR respectively.

Unit: eV

| $E_g$<br>Formula                | PBE  | SISSO-<br>GBDT | SISSO-<br>RF | SISSO-<br>SVR | $E_g$<br>Formula                | PBE  | SISSO-<br>GBDT | SISSO-<br>RF | SISSO-<br>SVR |
|---------------------------------|------|----------------|--------------|---------------|---------------------------------|------|----------------|--------------|---------------|
| Ac <sub>2</sub> O <sub>3</sub>  | 3.56 | 6.49           | 6.31         | 6.37          | As <sub>2</sub> O <sub>5</sub>  | 1.43 | 2.74           | 2.94         | 3.50          |
| Ac <sub>2</sub> S <sub>3</sub>  | 2.27 | 4.15           | 3.42         | 4.07          | As <sub>2</sub> Os              | 0.76 | 0.56           | 0.95         | 0.07          |
| AcBr <sub>3</sub>               | 4.11 | 6.40           | 6.38         | 6.89          | As <sub>2</sub> Pt              | 0.29 | 0.30           | 0.54         | 0             |
| AcCl <sub>3</sub>               | 5.11 | 7.62           | 7.64         | 8.15          | As <sub>2</sub> Rh              | 0.31 | 0.32           | 0.56         | 0             |
| AcF <sub>3</sub>                | 6.21 | 9.66           | 9.64         | 11.21         | As <sub>2</sub> Ru              | 0.56 | 0.40           | 0.74         | 0             |
| AcH <sub>3</sub>                | 0.68 | 2.09           | 2.00         | 3.93          | As <sub>2</sub> S <sub>3</sub>  | 2.20 | 2.26           | 2.82         | 2.45          |
| AcI <sub>3</sub>                | 2.59 | 4.56           | 4.33         | 5.18          | As <sub>2</sub> Se <sub>3</sub> | 0.63 | 0.97           | 1.18         | 1.48          |
| AcMg <sub>149</sub>             | 0.22 | 0.11           | 0.58         | 0.58          | As <sub>3</sub> Ir              | 0.03 | 0              | 0.18         | 0             |
| AcN                             | 0.06 | 2.65           | 2.23         | 4.04          | AsBr <sub>3</sub>               | 3.20 | 3.57           | 4.30         | 4.33          |
| Ag <sub>2</sub> O               | 0.06 | 2.04           | 1.78         | 1.71          | AsCl <sub>3</sub>               | 4.10 | 4.54           | 5.45         | 5.24          |
| Ag <sub>2</sub> S               | 1.39 | 2.04           | 2.27         | 1.58          | AsCl <sub>5</sub>               | 1.46 | 2.42           | 2.68         | 4.36          |
| Ag <sub>3</sub> P <sub>11</sub> | 1.10 | 1.24           | 1.55         | 0.95          | AsF <sub>3</sub>                | 5.40 | 6.52           | 7.67         | 7.61          |
| AgBr                            | 1.17 | 2.37           | 2.44         | 2.49          | AsF <sub>5</sub>                | 4.63 | 5.91           | 6.86         | 7.67          |
| AgCl                            | 1.20 | 2.64           | 2.68         | 2.87          | AsI <sub>3</sub>                | 2.25 | 2.41           | 2.84         | 3.32          |
| AgF <sub>3</sub>                | 0.21 | 2.78           | 2.50         | 3.83          | AsS                             | 2.12 | 2.20           | 2.77         | 2.97          |
| AgI                             | 1.72 | 2.43           | 2.70         | 2.40          | AsS <sub>2</sub>                | 1.29 | 1.54           | 1.90         | 2.37          |
| Al <sub>2</sub> O <sub>3</sub>  | 6.04 | 7.59           | 8.37         | 5.35          | Au <sub>2</sub> O <sub>3</sub>  | 0.89 | 1.84           | 2.01         | 1.33          |
| Al <sub>2</sub> Os              | 0.31 | 1.37           | 1.08         | 0             | Au <sub>2</sub> S               | 1.91 | 1.53           | 2.17         | 1.17          |
| Al <sub>2</sub> Ru              | 0.10 | 1.20           | 0.85         | 0             | Au <sub>3</sub> F <sub>8</sub>  | 0.55 | 2.20           | 2.22         | 5.78          |
| Al <sub>2</sub> S <sub>3</sub>  | 3.24 | 4.27           | 4.54         | 2.94          | AuBr                            | 2.06 | 2.19           | 2.73         | 2.16          |
| Al <sub>2</sub> Se <sub>3</sub> | 2.16 | 3.35           | 2.55         | 2.22          | AuBr <sub>3</sub>               | 0.81 | 1.15           | 1.42         | 1.64          |
| Al <sub>2</sub> Te <sub>3</sub> | 1.84 | 2.46           | 2.09         | 1.82          | AuCl                            | 2.08 | 2.47           | 2.96         | 2.44          |
| Al <sub>2</sub> Te <sub>5</sub> | 1.13 | 1.89           | 1.82         | 1.71          | AuCl <sub>2</sub>               | 0.96 | 1.55           | 1.79         | 1.85          |
| Al <sub>4</sub> C <sub>3</sub>  | 1.34 | 2.69           | 2.52         | 1.39          | AuCl <sub>3</sub>               | 1.39 | 1.90           | 2.24         | 2.13          |
| AlAs                            | 1.69 | 2.46           | 2.33         | 2.12          | AuF <sub>3</sub>                | 1.55 | 3.03           | 3.27         | 3.25          |
| AlBr <sub>3</sub>               | 4.10 | 5.45           | 5.84         | 4.67          | AuF <sub>5</sub>                | 0.79 | 2.40           | 2.47         | 3.53          |
| AlCl <sub>3</sub>               | 5.31 | 6.67           | 7.31         | 5.71          | AuI                             | 2.09 | 1.80           | 2.45         | 1.85          |
| AlF <sub>3</sub>                | 7.72 | 9.55           | 10.70        | 8.60          | AuSe                            | 0.32 | 0.17           | 0.48         | 0.61          |
| AlH <sub>3</sub>                | 3.25 | 3.76           | 4.15         | 9.84          | B <sub>2</sub> H <sub>5</sub>   | 6.35 | 5.33           | 6.94         | 8.10          |
| AlI <sub>3</sub>                | 3.27 | 4.40           | 4.65         | 3.74          | B <sub>2</sub> O <sub>3</sub>   | 6.34 | 6.96           | 8.23         | 6.53          |
| AlN                             | 4.05 | 5.51           | 5.87         | 4.98          | B <sub>2</sub> S <sub>3</sub>   | 2.53 | 2.78           | 3.23         | 3.21          |
| AlP                             | 1.82 | 2.58           | 2.20         | 2.40          | B <sub>3</sub> H <sub>7</sub>   | 3.56 | 3.07           | 4.02         | 2.14          |
| AlSb                            | 1.26 | 1.92           | 1.91         | 1.50          | B <sub>6</sub> As               | 2.97 | 2.56           | 3.39         | 2.94          |
| As <sub>2</sub> Ir              | 1.15 | 0.88           | 1.36         | 0.38          | B <sub>6</sub> O                | 2.21 | 3.61           | 3.56         | 4.34          |
| As <sub>2</sub> O <sub>3</sub>  | 3.63 | 4.50           | 5.25         | 4.25          | B <sub>6</sub> P                | 2.73 | 2.37           | 3.14         | 3.02          |
| B <sub>9</sub> H <sub>11</sub>  | 2.91 | 2.54           | 3.35         | 0.29          | BeBr <sub>2</sub>               | 5.35 | 6.84           | 7.18         | 7.25          |

|                                  |      |       |       |       |                                   |      |       |       |       |
|----------------------------------|------|-------|-------|-------|-----------------------------------|------|-------|-------|-------|
| Ba <sub>2</sub> Ge               | 0.05 | 1.27  | 1.36  | 0.40  | BeCl <sub>2</sub>                 | 6.34 | 8.11  | 8.44  | 8.48  |
| Ba <sub>2</sub> Pb               | 0.04 | 1.73  | 1.68  | 0.25  | BeF <sub>2</sub>                  | 7.96 | 10.80 | 10.99 | 11.75 |
| Ba <sub>2</sub> Sb <sub>3</sub>  | 0.27 | 1.55  | 1.63  | 1.11  | BeH <sub>2</sub>                  | 5.40 | 5.75  | 6.44  | 16.70 |
| Ba <sub>2</sub> Si               | 0.06 | 1.10  | 1.25  | 0.48  | BeI <sub>2</sub>                  | 4.08 | 5.14  | 5.54  | 5.74  |
| Ba <sub>2</sub> Sn               | 0.02 | 1.15  | 1.27  | 0.22  | BeO                               | 7.46 | 9.60  | 9.90  | 9.47  |
| Ba <sub>3</sub> As <sub>14</sub> | 1.18 | 2.65  | 2.12  | 1.68  | BeP <sub>2</sub>                  | 0.86 | 1.20  | 1.68  | 2.69  |
| Ba <sub>3</sub> P <sub>14</sub>  | 1.92 | 3.40  | 2.93  | 2.19  | BeS                               | 3.24 | 4.18  | 4.58  | 4.89  |
| Ba <sub>3</sub> P <sub>2</sub>   | 0.22 | 1.71  | 1.73  | 1.63  | BeSe                              | 2.90 | 3.80  | 4.19  | 4.37  |
| Ba <sub>3</sub> P <sub>4</sub>   | 0.48 | 1.97  | 2.00  | 1.82  | BeTe                              | 2.21 | 2.40  | 3.00  | 3.53  |
| Ba <sub>3</sub> Si <sub>4</sub>  | 0.00 | 1.05  | 1.19  | 0.50  | BF <sub>3</sub>                   | 8.16 | 9.05  | 10.70 | 10.45 |
| Ba <sub>4</sub> P <sub>3</sub>   | 0.75 | 2.23  | 2.28  | 1.87  | BH <sub>3</sub>                   | 5.28 | 4.47  | 5.83  | 14.66 |
| Ba <sub>5</sub> P <sub>4</sub>   | 0.96 | 2.45  | 2.35  | 1.98  | Bi <sub>2</sub> O <sub>3</sub>    | 2.25 | 3.67  | 3.49  | 3.02  |
| Ba <sub>5</sub> Sb <sub>4</sub>  | 0.27 | 1.55  | 1.63  | 1.00  | Bi <sub>2</sub> S <sub>3</sub>    | 1.50 | 1.99  | 2.29  | 1.72  |
| BaAs <sub>2</sub>                | 0.43 | 1.90  | 1.94  | 1.74  | Bi <sub>2</sub> Se <sub>3</sub>   | 0.54 | 1.19  | 1.26  | 1.12  |
| BaB <sub>6</sub>                 | 0.06 | 1.32  | 1.40  | 3.95  | Bi <sub>2</sub> Te <sub>3</sub>   | 0.39 | 0.41  | 0.62  | 0.83  |
| BaBr <sub>2</sub>                | 4.37 | 6.92  | 6.88  | 5.83  | BI <sub>3</sub>                   | 0.00 | 0.84  | 0.78  | 2.67  |
| BaCl <sub>2</sub>                | 5.61 | 8.41  | 8.38  | 7.08  | Bi <sub>3</sub> Sb                | 0.08 | 0.08  | 0.24  | 0.13  |
| BaF <sub>2</sub>                 | 6.62 | 10.43 | 10.30 | 9.62  | Bi <sub>4</sub> O <sub>7</sub>    | 0.90 | 2.59  | 2.56  | 3.23  |
| BaF <sub>3</sub>                 | 0.88 | 4.69  | 4.29  | 6.19  | Bi <sub>4</sub> Te <sub>3</sub>   | 0.26 | 0.30  | 0.49  | 0.55  |
| BaGe <sub>2</sub>                | 0.57 | 1.79  | 1.91  | 0.89  | BiBr <sub>3</sub>                 | 2.91 | 3.61  | 4.05  | 3.58  |
| BaH <sub>2</sub>                 | 2.87 | 4.37  | 4.51  | 14.49 | BiCl <sub>3</sub>                 | 3.43 | 4.27  | 4.91  | 4.21  |
| BaI <sub>2</sub>                 | 3.44 | 5.58  | 5.58  | 5.05  | BiF <sub>3</sub>                  | 4.70 | 6.23  | 7.10  | 6.30  |
| BaMg <sub>149</sub>              | 0.36 | 0.36  | 0.95  | 0.12  | BiF <sub>5</sub>                  | 1.90 | 4.00  | 4.18  | 5.44  |
| BaN <sub>6</sub>                 | 3.81 | 6.46  | 6.38  | 6.26  | BiI <sub>3</sub>                  | 2.56 | 2.95  | 3.27  | 2.96  |
| BaO                              | 2.26 | 5.41  | 2.69  | 4.89  | BiO <sub>2</sub>                  | 1.08 | 2.73  | 2.75  | 2.84  |
| BaO <sub>2</sub>                 | 2.29 | 5.45  | 2.79  | 4.67  | BiS <sub>2</sub>                  | 1.19 | 1.74  | 1.96  | 1.92  |
| BaP <sub>2</sub>                 | 0.90 | 2.39  | 2.42  | 2.23  | BN                                | 4.49 | 4.98  | 5.88  | 6.18  |
| BaP <sub>3</sub>                 | 2.12 | 2.20  | 2.77  | 2.97  | BP                                | 1.47 | 1.35  | 1.83  | 2.73  |
| BaS                              | 1.29 | 1.54  | 1.90  | 2.37  | Br <sub>2</sub> O <sub>3</sub>    | 1.79 | 2.02  | 2.51  | 2.72  |
| BaS <sub>2</sub>                 | 0.89 | 1.84  | 2.01  | 1.33  | BrCl                              | 1.83 | 1.70  | 2.26  | 3.47  |
| BaS <sub>3</sub>                 | 1.91 | 1.53  | 2.17  | 1.17  | BrF <sub>3</sub>                  | 2.34 | 3.09  | 3.65  | 5.21  |
| BaSe                             | 0.55 | 2.20  | 2.22  | 5.78  | BrF <sub>5</sub>                  | 3.46 | 3.97  | 3.78  | 6.37  |
| BaSe <sub>2</sub>                | 2.06 | 2.19  | 2.73  | 2.16  | BS <sub>2</sub>                   | 2.55 | 2.80  | 3.32  | 3.61  |
| BaSi <sub>2</sub>                | 0.81 | 1.15  | 1.42  | 1.64  | BSe <sub>2</sub>                  | 1.77 | 2.12  | 2.52  | 2.92  |
| BaSn <sub>2</sub>                | 2.08 | 2.47  | 2.96  | 2.44  | Ca <sub>2</sub> As <sub>3</sub>   | 0.17 | 1.42  | 1.54  | 1.85  |
| BaTe                             | 0.96 | 1.55  | 1.79  | 1.85  | Ca <sub>2</sub> Bi                | 0.05 | 1.06  | 1.26  | 0.76  |
| BBr <sub>3</sub>                 | 1.39 | 1.90  | 2.24  | 2.13  | Ca <sub>2</sub> Ge                | 0.31 | 1.30  | 1.52  | 0.84  |
| BCl <sub>3</sub>                 | 1.55 | 3.03  | 3.27  | 3.25  | Ca <sub>2</sub> Pb                | 0.08 | 1.55  | 1.61  | 0.52  |
| Be <sub>2</sub> C                | 0.79 | 2.40  | 2.47  | 3.53  | Ca <sub>2</sub> Si                | 0.29 | 1.10  | 1.38  | 0.92  |
| Be <sub>3</sub> N <sub>2</sub>   | 3.72 | 5.32  | 5.56  | 5.49  | Ca <sub>2</sub> Sn                | 0.06 | 0.97  | 1.20  | 0.48  |
| Be <sub>3</sub> P <sub>2</sub>   | 0.89 | 1.23  | 1.71  | 2.29  | Ca <sub>31</sub> Sn <sub>20</sub> | 0.04 | 0.94  | 1.18  | 0.28  |
| Be <sub>5</sub> Pt               | 0.15 | 0.64  | 1.04  | 0     | Ca <sub>3</sub> N <sub>2</sub>    | 1.11 | 3.56  | 3.20  | 4.11  |
| Ca <sub>4</sub> As <sub>3</sub>  | 0.69 | 1.94  | 2.09  | 2.01  | CO <sub>2</sub>                   | 6.64 | 6.42  | 8.01  | 7.60  |
| Ca <sub>5</sub> P <sub>8</sub>   | 1.19 | 2.46  | 2.22  | 3.75  | CoAs <sub>2</sub>                 | 0.17 | 0.50  | 0.63  | 1.05  |

|                                 |      |       |       |       |                                  |      |      |      |      |
|---------------------------------|------|-------|-------|-------|----------------------------------|------|------|------|------|
| Ca <sub>5</sub> Sb <sub>3</sub> | 0.25 | 1.30  | 1.50  | 1.29  | CoBr <sub>2</sub>                | 0.12 | 1.55 | 1.39 | 2.20 |
| CaB <sub>6</sub>                | 3.72 | 5.32  | 5.56  | 5.49  | CoCl <sub>2</sub>                | 0.10 | 1.78 | 1.58 | 2.58 |
| CaBr <sub>2</sub>               | 0.89 | 1.23  | 1.71  | 2.29  | CoF <sub>2</sub>                 | 2.27 | 4.59 | 3.89 | 5.19 |
| CaCl <sub>2</sub>               | 0.15 | 0.64  | 1.04  | 0     | CoF <sub>3</sub>                 | 2.05 | 4.40 | 4.12 | 5.13 |
| CaF <sub>2</sub>                | 5.35 | 6.84  | 7.18  | 7.25  | CoO                              | 0.84 | 2.75 | 2.65 | 2.77 |
| CaH <sub>2</sub>                | 6.34 | 8.11  | 8.44  | 8.48  | CoO <sub>2</sub>                 | 0.59 | 2.54 | 2.38 | 2.63 |
| CaI <sub>2</sub>                | 7.96 | 10.80 | 10.99 | 11.75 | CoP <sub>2</sub>                 | 0.54 | 0.83 | 1.03 | 1.41 |
| CaMg <sub>149</sub>             | 5.40 | 5.75  | 6.44  | 16.70 | CoSb <sub>3</sub>                | 0.58 | 0.64 | 0.92 | 1.07 |
| CaN <sub>6</sub>                | 4.08 | 5.14  | 5.54  | 5.74  | Cr <sub>2</sub> O <sub>3</sub>   | 2.43 | 4.49 | 2.92 | 3.24 |
| CaO                             | 7.46 | 9.60  | 9.90  | 9.47  | Cr <sub>5</sub> O <sub>12</sub>  | 1.82 | 3.95 | 3.56 | 2.60 |
| CaP                             | 0.86 | 1.20  | 1.68  | 2.69  | CrBr <sub>3</sub>                | 1.29 | 2.88 | 2.84 | 2.90 |
| CaP <sub>3</sub>                | 3.24 | 4.18  | 4.58  | 4.89  | CrCl <sub>3</sub>                | 0.18 | 2.15 | 1.89 | 2.77 |
| CaS                             | 2.90 | 3.80  | 4.19  | 4.37  | CrF <sub>3</sub>                 | 3.09 | 5.70 | 3.92 | 5.68 |
| CaSe                            | 2.14 | 3.92  | 3.13  | 3.87  | CrF <sub>4</sub>                 | 1.57 | 4.36 | 4.20 | 5.09 |
| CaTe                            | 1.60 | 2.73  | 1.93  | 3.15  | CrF <sub>5</sub>                 | 1.46 | 4.26 | 4.09 | 5.27 |
| CCl <sub>4</sub>                | 4.51 | 4.36  | 5.50  | 6.89  | CrF <sub>6</sub>                 | 2.09 | 4.82 | 3.85 | 6.02 |
| CdAs <sub>2</sub>               | 0.19 | 1.02  | 0.85  | 1.28  | CrI <sub>3</sub>                 | 1.16 | 2.36 | 2.40 | 2.37 |
| CdBr <sub>2</sub>               | 2.94 | 4.31  | 4.50  | 4.13  | CS <sub>14</sub>                 | 2.70 | 2.12 | 2.99 | 3.48 |
| CdCl <sub>2</sub>               | 3.59 | 5.09  | 5.43  | 4.92  | Cs <sub>2</sub> As <sub>3</sub>  | 0.68 | 1.57 | 2.30 | 1.58 |
| CdF <sub>2</sub>                | 3.07 | 5.60  | 3.84  | 6.32  | Cs <sub>2</sub> In <sub>3</sub>  | 2.14 | 3.92 | 3.13 | 3.87 |
| CdI <sub>2</sub>                | 2.44 | 3.52  | 3.24  | 3.34  | Cs <sub>2</sub> O                | 1.60 | 2.73 | 1.93 | 3.15 |
| CdP <sub>2</sub>                | 1.59 | 2.18  | 2.32  | 2.18  | Cs <sub>2</sub> O <sub>2</sub>   | 4.51 | 4.36 | 5.50 | 6.89 |
| CdS                             | 1.12 | 2.33  | 2.23  | 2.28  | Cs <sub>2</sub> P <sub>3</sub>   | 0.19 | 1.02 | 0.85 | 1.28 |
| CdS <sub>2</sub>                | 1.54 | 2.68  | 2.67  | 2.44  | Cs <sub>2</sub> S                | 2.94 | 4.31 | 4.50 | 4.13 |
| CdSb                            | 0.05 | 0.71  | 0.57  | 0.77  | Cs <sub>2</sub> S <sub>3</sub>   | 3.59 | 5.09 | 5.43 | 4.92 |
| CdSe                            | 0.51 | 1.80  | 1.57  | 1.69  | Cs <sub>2</sub> S <sub>5</sub>   | 3.07 | 5.60 | 3.84 | 6.32 |
| CdTe                            | 1.23 | 1.75  | 1.85  | 1.90  | Cs <sub>2</sub> Sb               | 2.44 | 3.52 | 3.24 | 3.34 |
| Ce <sub>2</sub> Br <sub>5</sub> | 0.00 | 1.62  | 2.06  | 2.32  | Cs <sub>2</sub> Se               | 1.59 | 2.18 | 2.32 | 2.18 |
| CeAs <sub>2</sub>               | 0.07 | 1.40  | 1.26  | 1.04  | Cs <sub>2</sub> Se <sub>3</sub>  | 1.12 | 2.33 | 2.23 | 2.28 |
| CeBr <sub>3</sub>               | 0.01 | 1.62  | 2.06  | 2.42  | Cs <sub>2</sub> Se <sub>5</sub>  | 1.54 | 2.68 | 2.67 | 2.44 |
| CeCl <sub>3</sub>               | 0.01 | 1.71  | 2.27  | 2.84  | Cs <sub>2</sub> Te               | 0.05 | 0.71 | 0.57 | 0.77 |
| CeF <sub>4</sub>                | 2.15 | 3.80  | 1.45  | 5.56  | Cs <sub>2</sub> Te <sub>3</sub>  | 0.55 | 1.30 | 2.08 | 1.62 |
| CeO <sub>2</sub>                | 1.88 | 3.30  | 1.39  | 3.45  | Cs <sub>3</sub> As <sub>11</sub> | 1.39 | 2.33 | 1.79 | 1.75 |
| CF <sub>4</sub>                 | 9.07 | 9.00  | 11.12 | 11.65 | Cs <sub>3</sub> As <sub>7</sub>  | 1.57 | 2.53 | 1.96 | 3.68 |
| Cl <sub>2</sub> O               | 1.15 | 1.32  | 1.63  | 2.62  | Cs <sub>3</sub> Bi               | 0.36 | 0.97 | 1.80 | 0.57 |
| Cl <sub>2</sub> O <sub>7</sub>  | 3.68 | 3.31  | 4.27  | 7.14  | Cs <sub>3</sub> P <sub>7</sub>   | 2.34 | 3.38 | 4.05 | 4.64 |
| ClF                             | 2.09 | 2.71  | 3.18  | 5.45  | Cs <sub>3</sub> Sb               | 1.10 | 1.82 | 1.95 | 1.49 |
| ClF <sub>3</sub>                | 2.54 | 3.06  | 3.65  | 5.67  | Cs <sub>4</sub> Pb <sub>9</sub>  | 0.82 | 1.95 | 2.54 | 0.56 |
| ClF <sub>5</sub>                | 3.12 | 3.52  | 4.26  | 6.64  | Cs <sub>5</sub> Sb <sub>8</sub>  | 0.58 | 1.26 | 2.06 | 1.86 |
| ClO <sub>2</sub>                | 0.97 | 1.18  | 1.44  | 3.04  | CsAu                             | 1.99 | 3.51 | 2.88 | 1.29 |
| ClO <sub>3</sub>                | 1.21 | 1.37  | 1.69  | 3.34  | CsBi                             | 0.25 | 0.85 | 1.68 | 0.67 |
| CsBr                            | 4.42 | 6.73  | 7.04  | 6.08  | ErCl <sub>3</sub>                | 2.34 | 3.38 | 4.05 | 4.64 |
| CsBr <sub>3</sub>               | 2.32 | 4.46  | 3.51  | 4.31  | ErF <sub>3</sub>                 | 1.10 | 1.82 | 1.95 | 1.49 |
| CsCl                            | 5.02 | 7.64  | 7.87  | 6.98  | ErH <sub>3</sub>                 | 0.82 | 1.95 | 2.54 | 0.56 |

|                                  |      |      |      |       |                                  |      |      |      |      |
|----------------------------------|------|------|------|-------|----------------------------------|------|------|------|------|
| CsF                              | 5.28 | 8.98 | 9.00 | 9.02  | ErI <sub>3</sub>                 | 0.58 | 1.26 | 2.06 | 1.86 |
| CsGa <sub>3</sub>                | 0.13 | 0.38 | 1.33 | 0     | ErMg <sub>149</sub>              | 1.99 | 3.51 | 2.88 | 1.29 |
| CsGe                             | 1.20 | 1.87 | 1.80 | 1.21  | ErN                              | 0.25 | 0.85 | 1.68 | 0.67 |
| CsH                              | 2.59 | 3.66 | 4.32 | 12.82 | ErS <sub>2</sub>                 | 4.42 | 6.73 | 7.04 | 6.08 |
| CsI                              | 3.86 | 5.70 | 6.13 | 5.11  | EuBr <sub>2</sub>                | 2.32 | 4.46 | 3.51 | 4.31 |
| CsI <sub>3</sub>                 | 2.02 | 3.71 | 2.85 | 3.58  | EuCl <sub>2</sub>                | 1.52 | 2.87 | 2.12 | 3.41 |
| CsI <sub>4</sub>                 | 1.78 | 3.46 | 2.13 | 3.50  | EuI <sub>2</sub>                 | 1.23 | 2.46 | 2.08 | 2.39 |
| CsIn <sub>3</sub>                | 0.17 | 0.37 | 1.35 | 0     | EuMg <sub>149</sub>              | 0.02 | 1.45 | 0.26 | 0.77 |
| CsN <sub>3</sub>                 | 4.26 | 6.66 | 6.95 | 5.04  | EuP <sub>7</sub>                 | 0.39 | 1.69 | 1.32 | 6.21 |
| CsP <sub>7</sub>                 | 1.28 | 2.23 | 1.92 | 5.91  | FeAs <sub>2</sub>                | 0.29 | 0.66 | 0.80 | 1.16 |
| CsS                              | 1.73 | 3.29 | 2.05 | 3.09  | FeBr <sub>3</sub>                | 0.03 | 1.53 | 1.35 | 2.36 |
| CsS <sub>3</sub>                 | 1.68 | 3.23 | 1.90 | 2.87  | FeCl <sub>3</sub>                | 0.43 | 2.13 | 1.98 | 2.95 |
| CsSb                             | 0.56 | 1.23 | 2.03 | 1.30  | FeCl <sub>4</sub>                | 0.28 | 2.00 | 1.82 | 3.04 |
| CsSe <sub>4</sub>                | 0.97 | 2.43 | 2.61 | 2.36  | FeF <sub>2</sub>                 | 1.74 | 4.23 | 4.21 | 5.09 |
| CsSi                             | 1.56 | 2.08 | 2.23 | 1.51  | FeF <sub>3</sub>                 | 3.07 | 5.36 | 3.68 | 5.77 |
| CsSn                             | 1.14 | 1.71 | 1.82 | 1.01  | FeO                              | 2.30 | 4.08 | 3.24 | 3.77 |
| CsTe                             | 1.01 | 1.79 | 2.11 | 2.10  | FeP <sub>2</sub>                 | 0.47 | 0.83 | 1.00 | 1.43 |
| CsTe <sub>4</sub>                | 0.63 | 1.39 | 2.16 | 1.91  | FeP <sub>4</sub>                 | 0.90 | 1.20 | 1.45 | 2.01 |
| Cu <sub>2</sub> O                | 0.51 | 2.46 | 2.28 | 2.46  | FeS <sub>2</sub>                 | 0.98 | 1.84 | 1.94 | 1.92 |
| Cu <sub>2</sub> P <sub>7</sub>   | 0.91 | 1.14 | 1.39 | 5.47  | FeSe <sub>2</sub>                | 0.40 | 1.30 | 1.31 | 1.45 |
| CuBr                             | 0.49 | 1.86 | 1.75 | 2.54  | FeSi                             | 0.17 | 0.10 | 0.38 | 0.40 |
| CuI                              | 1.46 | 2.27 | 2.46 | 2.69  | FeSi <sub>2</sub>                | 0.70 | 0.56 | 0.94 | 0.75 |
| CuP <sub>10</sub>                | 1.04 | 1.25 | 1.53 | 2.55  | FeTe <sub>2</sub>                | 0.12 | 0.39 | 0.55 | 1.08 |
| CuP <sub>2</sub>                 | 0.96 | 1.19 | 1.45 | 1.73  | Ga <sub>2</sub> I <sub>3</sub>   | 2.25 | 3.12 | 2.53 | 2.42 |
| Dy <sub>2</sub> O <sub>3</sub>   | 3.94 | 4.72 | 4.29 | 4.12  | Ga <sub>2</sub> O <sub>3</sub>   | 2.04 | 3.90 | 3.49 | 2.91 |
| Dy <sub>2</sub> S <sub>3</sub>   | 0.59 | 1.88 | 1.83 | 1.56  | Ga <sub>2</sub> Ru               | 0.12 | 0.75 | 0.67 | 0    |
| Dy <sub>2</sub> Se <sub>3</sub>  | 0.57 | 1.86 | 1.79 | 1.36  | Ga <sub>2</sub> S <sub>3</sub>   | 2.03 | 2.83 | 2.61 | 1.95 |
| Dy <sub>2</sub> Te <sub>3</sub>  | 0.79 | 1.92 | 1.42 | 1.22  | Ga <sub>2</sub> Se <sub>3</sub>  | 1.68 | 2.51 | 2.67 | 1.62 |
| Dy <sub>6</sub> Se <sub>11</sub> | 0.53 | 1.83 | 1.77 | 1.18  | Ga <sub>2</sub> Te <sub>3</sub>  | 1.01 | 1.32 | 1.50 | 1.10 |
| DyBr <sub>3</sub>                | 3.01 | 3.83 | 3.36 | 3.86  | Ga <sub>2</sub> Te <sub>5</sub>  | 1.02 | 1.32 | 1.50 | 1.37 |
| DyCl <sub>3</sub>                | 3.90 | 4.57 | 3.98 | 4.70  | Ga <sub>3</sub> Fe               | 0.58 | 0.53 | 0.76 | 0    |
| DyF <sub>3</sub>                 | 7.87 | 7.93 | 6.68 | 8.22  | Ga <sub>3</sub> Os               | 0.97 | 1.43 | 1.55 | 0    |
| DyH <sub>3</sub>                 | 0.01 | 1.35 | 1.16 | 3.46  | Ga <sub>3</sub> Ru               | 0.72 | 1.23 | 1.30 | 0    |
| DyI <sub>3</sub>                 | 2.18 | 3.09 | 1.65 | 2.97  | Ga <sub>7</sub> Te <sub>10</sub> | 0.90 | 1.23 | 1.38 | 0.91 |
| DyMg <sub>149</sub>              | 0.26 | 1.59 | 0.35 | 0.82  | GaAs                             | 0.18 | 0.77 | 0.71 | 0.92 |
| DyN                              | 0.21 | 1.76 | 2.14 | 2.36  | GaBr <sub>2</sub>                | 3.11 | 4.19 | 4.59 | 3.63 |
| Er <sub>2</sub> O <sub>3</sub>   | 0.55 | 1.30 | 2.08 | 1.62  | GaBr <sub>3</sub>                | 3.36 | 4.40 | 4.86 | 3.75 |
| Er <sub>2</sub> S <sub>3</sub>   | 1.39 | 2.33 | 1.79 | 1.75  | GaCl <sub>2</sub>                | 4.03 | 5.19 | 5.76 | 4.47 |
| Er <sub>2</sub> Se <sub>3</sub>  | 1.57 | 2.53 | 1.96 | 3.68  | GaCl <sub>3</sub>                | 4.28 | 5.39 | 6.02 | 4.56 |
| Er <sub>2</sub> Te <sub>3</sub>  | 0.36 | 0.97 | 1.80 | 0.57  | GaF <sub>3</sub>                 | 4.84 | 6.78 | 7.47 | 6.30 |
| GaI <sub>2</sub>                 | 2.38 | 3.22 | 2.94 | 2.81  | H <sub>3</sub> N                 | 4.34 | 5.63 | 5.56 | 7.94 |
| GaI <sub>3</sub>                 | 2.39 | 3.22 | 2.95 | 2.84  | H <sub>3</sub> S                 | 4.35 | 4.90 | 5.08 | 6.63 |
| GaN                              | 1.74 | 3.18 | 3.24 | 3.07  | H <sub>4</sub> C                 | 7.64 | 8.40 | 8.49 | 8.17 |
| GaP                              | 1.68 | 2.00 | 2.29 | 1.99  | HBr                              | 4.94 | 6.16 | 6.10 | 9.30 |

|                                  |      |       |       |       |                                   |      |      |      |       |
|----------------------------------|------|-------|-------|-------|-----------------------------------|------|------|------|-------|
| GaS                              | 2.01 | 2.81  | 2.62  | 2.44  | HCl                               | 5.97 | 7.57 | 7.39 | 10.95 |
| GaSb                             | 0.37 | 0.71  | 0.77  | 0.72  | HF                                | 6.72 | 9.56 | 9.03 | 14.42 |
| GaSe                             | 1.26 | 2.16  | 2.22  | 1.80  | Hf <sub>3</sub> N <sub>4</sub>    | 1.01 | 3.29 | 3.01 | 2.77  |
| GaTe                             | 0.90 | 1.22  | 1.38  | 1.37  | HfBr <sub>4</sub>                 | 4.29 | 6.23 | 6.36 | 4.90  |
| Gd <sub>10</sub> S <sub>19</sub> | 0.34 | 1.71  | 1.72  | 1.22  | HfCl <sub>4</sub>                 | 4.18 | 6.39 | 6.46 | 5.28  |
| Gd <sub>2</sub> C <sub>13</sub>  | 0.09 | 1.74  | 2.22  | 2.68  | HfF <sub>4</sub>                  | 5.46 | 8.55 | 8.65 | 7.61  |
| Gd <sub>2</sub> O <sub>3</sub>   | 2.94 | 4.02  | 2.67  | 3.75  | HfI <sub>4</sub>                  | 2.31 | 4.00 | 3.25 | 3.39  |
| Gd <sub>2</sub> S <sub>3</sub>   | 0.46 | 1.79  | 1.77  | 1.55  | HfMg <sub>149</sub>               | 0.14 | 0    | 0.29 | 1.00  |
| Gd <sub>2</sub> Se <sub>3</sub>  | 0.62 | 1.90  | 1.81  | 1.43  | HfO <sub>2</sub>                  | 4.07 | 6.62 | 6.63 | 4.85  |
| Gd <sub>2</sub> Te <sub>3</sub>  | 0.10 | 1.40  | 1.12  | 0.95  | HfS <sub>2</sub>                  | 1.23 | 2.89 | 2.76 | 2.29  |
| GdBr <sub>3</sub>                | 1.52 | 2.87  | 2.12  | 3.41  | HfS <sub>3</sub>                  | 1.14 | 2.81 | 2.66 | 2.29  |
| GdCl <sub>3</sub>                | 1.23 | 2.46  | 2.08  | 2.39  | HfSe <sub>2</sub>                 | 0.55 | 2.23 | 2.02 | 1.74  |
| GdF <sub>3</sub>                 | 0.02 | 1.45  | 0.26  | 0.77  | HfSe <sub>3</sub>                 | 0.61 | 2.28 | 2.08 | 1.84  |
| GdH <sub>3</sub>                 | 0.39 | 1.69  | 1.32  | 6.21  | HgBr                              | 2.46 | 3.31 | 2.75 | 3.13  |
| GdP <sub>5</sub>                 | 0.29 | 0.66  | 0.80  | 1.16  | HgBr <sub>2</sub>                 | 2.84 | 3.61 | 3.86 | 3.09  |
| GdS <sub>2</sub>                 | 0.03 | 1.53  | 1.35  | 2.36  | HgCl                              | 2.82 | 3.85 | 3.59 | 3.69  |
| Ge <sub>3</sub> F <sub>8</sub>   | 0.43 | 2.13  | 1.98  | 2.95  | HgCl <sub>2</sub>                 | 3.17 | 4.14 | 4.67 | 3.60  |
| Ge <sub>3</sub> N <sub>4</sub>   | 0.28 | 2.00  | 1.82  | 3.04  | HgF                               | 1.98 | 4.11 | 4.28 | 4.53  |
| Ge <sub>3</sub> Ru <sub>2</sub>  | 1.74 | 4.23  | 4.21  | 5.09  | HgF <sub>2</sub>                  | 1.17 | 3.45 | 3.43 | 4.00  |
| Ge <sub>5</sub> F <sub>12</sub>  | 3.07 | 5.36  | 3.68  | 5.77  | HgI                               | 1.89 | 2.44 | 2.80 | 2.38  |
| Ge <sub>5</sub> Ir <sub>4</sub>  | 2.30 | 4.08  | 3.24  | 3.77  | HgI <sub>2</sub>                  | 1.46 | 2.09 | 2.35 | 2.04  |
| GeAs <sub>2</sub>                | 0.47 | 0.83  | 1.00  | 1.43  | HgO                               | 1.25 | 2.90 | 2.95 | 2.58  |
| GeBr <sub>2</sub>                | 2.60 | 3.39  | 3.09  | 3.71  | HgS <sub>4</sub>                  | 1.05 | 1.64 | 1.84 | 1.88  |
| GeBr <sub>4</sub>                | 3.08 | 3.77  | 4.35  | 4.11  | HgSe                              | 0.12 | 0.85 | 0.84 | 0.90  |
| GeCl <sub>4</sub>                | 4.27 | 4.98  | 5.80  | 5.10  | HI                                | 4.08 | 4.75 | 4.89 | 7.66  |
| GeF <sub>2</sub>                 | 4.03 | 5.73  | 6.42  | 6.48  | Ho <sub>13</sub> Zn <sub>58</sub> | 0.05 | 1.35 | 0.60 | 0     |
| GeF <sub>4</sub>                 | 5.68 | 7.06  | 8.14  | 7.39  | Ho <sub>2</sub> O <sub>3</sub>    | 3.96 | 4.73 | 4.37 | 4.09  |
| GeH <sub>4</sub>                 | 5.78 | 4.91  | 6.39  | 13.16 | Ho <sub>2</sub> S <sub>3</sub>    | 1.46 | 2.53 | 1.77 | 1.93  |
| GeI <sub>2</sub>                 | 2.07 | 2.58  | 2.85  | 2.94  | Ho <sub>2</sub> Se <sub>3</sub>   | 2.60 | 3.39 | 3.09 | 3.71  |
| GeI <sub>4</sub>                 | 2.00 | 2.51  | 2.90  | 3.11  | Ho <sub>2</sub> Te <sub>3</sub>   | 3.08 | 3.77 | 4.35 | 4.11  |
| GeO <sub>2</sub>                 | 3.26 | 4.51  | 4.68  | 4.20  | Ho <sub>4</sub> C <sub>7</sub>    | 4.27 | 4.98 | 5.80 | 5.10  |
| GeS                              | 1.24 | 1.79  | 2.02  | 2.20  | HoBr <sub>3</sub>                 | 4.03 | 5.73 | 6.42 | 6.48  |
| GeS <sub>2</sub>                 | 2.26 | 2.62  | 2.58  | 2.66  | HoCl <sub>3</sub>                 | 5.68 | 7.06 | 8.14 | 7.39  |
| GeSe                             | 0.44 | 1.11  | 1.16  | 1.51  | HoF <sub>3</sub>                  | 5.78 | 4.91 | 6.39 | 13.16 |
| GeSe <sub>2</sub>                | 1.66 | 2.10  | 2.44  | 2.17  | HoH <sub>3</sub>                  | 2.07 | 2.58 | 2.85 | 2.94  |
| GeTe                             | 0.82 | 0.76  | 1.09  | 1.51  | HoI <sub>3</sub>                  | 2.00 | 2.51 | 2.90 | 3.11  |
| H <sub>2</sub> O                 | 5.53 | 7.51  | 7.22  | 9.57  | HoMg <sub>149</sub>               | 3.26 | 4.51 | 4.68 | 4.20  |
| H <sub>2</sub> S                 | 4.37 | 4.93  | 5.11  | 6.76  | HoN                               | 1.24 | 1.79 | 2.02 | 2.20  |
| H <sub>3</sub> F <sub>2</sub>    | 7.91 | 10.84 | 10.27 | 14.15 | I <sub>2</sub> O <sub>5</sub>     | 2.26 | 2.62 | 2.58 | 2.66  |
| IBr                              | 0.44 | 1.11  | 1.16  | 1.51  | K <sub>2</sub> S <sub>5</sub>     | 1.95 | 3.49 | 2.69 | 3.53  |
| ICl                              | 1.86 | 2.05  | 2.61  | 3.27  | K <sub>2</sub> Se                 | 2.09 | 3.60 | 3.18 | 3.53  |
| ICl <sub>3</sub>                 | 1.81 | 2.02  | 2.56  | 3.23  | K <sub>2</sub> Se <sub>3</sub>    | 0.65 | 2.05 | 2.63 | 2.42  |
| IF <sub>5</sub>                  | 4.68 | 5.25  | 6.41  | 6.47  | K <sub>2</sub> Se <sub>5</sub>    | 0.94 | 2.36 | 2.68 | 2.70  |
| IF <sub>7</sub>                  | 1.55 | 2.78  | 3.14  | 7.43  | K <sub>2</sub> Te                 | 2.14 | 2.98 | 3.71 | 3.25  |

|                                  |      |      |      |      |                                   |      |      |      |       |
|----------------------------------|------|------|------|------|-----------------------------------|------|------|------|-------|
| In <sub>2</sub> Br <sub>3</sub>  | 2.13 | 3.46 | 2.87 | 2.48 | K <sub>2</sub> Te <sub>3</sub>    | 0.68 | 1.41 | 2.19 | 2.13  |
| In <sub>2</sub> O <sub>3</sub>   | 0.93 | 3.07 | 2.85 | 2.11 | K <sub>3</sub> As                 | 0.11 | 0.92 | 1.67 | 1.61  |
| In <sub>2</sub> S <sub>3</sub>   | 0.83 | 1.92 | 1.84 | 1.19 | K <sub>3</sub> As <sub>11</sub>   | 1.47 | 2.38 | 1.73 | 2.23  |
| In <sub>2</sub> Se <sub>3</sub>  | 0.99 | 2.01 | 1.98 | 1.09 | K <sub>3</sub> As <sub>7</sub>    | 1.40 | 2.31 | 1.81 | 4.01  |
| In <sub>2</sub> Te <sub>5</sub>  | 0.85 | 1.25 | 1.36 | 1.09 | K <sub>3</sub> Bi                 | 0.03 | 0.57 | 1.42 | 0.63  |
| In <sub>3</sub> Ru               | 0.25 | 0.91 | 0.83 | 0    | K <sub>3</sub> Bi                 | 0.04 | 0.58 | 1.43 | 0.64  |
| In <sub>4</sub> Te <sub>3</sub>  | 0.20 | 0.72 | 0.68 | 0.37 | K <sub>3</sub> Ga <sub>13</sub>   | 0.06 | 0.27 | 1.23 | 0     |
| In <sub>7</sub> Cl <sub>9</sub>  | 2.19 | 3.76 | 3.01 | 4.38 | K <sub>3</sub> P <sub>11</sub>    | 1.93 | 2.90 | 3.05 | 2.69  |
| In <sub>7</sub> Te <sub>10</sub> | 0.81 | 1.22 | 1.32 | 0.68 | K <sub>3</sub> Sb                 | 0.39 | 1.01 | 1.83 | 1.37  |
| InAs                             | 0.31 | 0.93 | 0.87 | 0.81 | K <sub>49</sub> Tl <sub>108</sub> | 0.05 | 0.63 | 1.46 | 0     |
| InBr                             | 1.62 | 3.05 | 3.06 | 2.67 | K <sub>4</sub> Sn <sub>9</sub>    | 1.12 | 1.66 | 1.87 | 0.95  |
| InBr <sub>2</sub>                | 2.42 | 3.70 | 2.77 | 2.93 | KAs                               | 1.13 | 2.01 | 2.10 | 2.50  |
| InBr <sub>3</sub>                | 2.76 | 3.97 | 3.84 | 3.10 | KBi                               | 0.41 | 0.98 | 1.82 | 1.08  |
| InCl                             | 2.19 | 3.75 | 3.01 | 3.36 | KBr                               | 4.52 | 6.79 | 7.10 | 7.01  |
| InCl <sub>2</sub>                | 3.02 | 4.43 | 4.46 | 3.57 | KCl                               | 5.04 | 7.64 | 7.86 | 7.96  |
| InCl <sub>3</sub>                | 3.03 | 4.44 | 4.48 | 3.57 | KF                                | 6.07 | 9.81 | 9.79 | 10.85 |
| InF <sub>3</sub>                 | 4.03 | 6.18 | 6.65 | 5.37 | KF <sub>2</sub>                   | 1.47 | 4.85 | 3.61 | 7.20  |
| InI                              | 1.74 | 2.77 | 2.88 | 2.33 | KGa <sub>3</sub>                  | 0.62 | 0.87 | 1.82 | 0.38  |
| InI <sub>2</sub>                 | 1.79 | 2.80 | 2.91 | 2.22 | KGe                               | 1.33 | 1.96 | 1.71 | 1.61  |
| InI <sub>3</sub>                 | 2.34 | 3.25 | 2.83 | 2.69 | KH                                | 3.54 | 4.64 | 5.28 | 17.07 |
| InN                              | 0.48 | 2.22 | 1.95 | 2.03 | KI                                | 4.04 | 5.87 | 6.29 | 6.01  |
| InP                              | 0.47 | 1.08 | 1.05 | 1.07 | KN <sub>3</sub>                   | 4.20 | 6.56 | 6.85 | 5.80  |
| InS                              | 1.55 | 2.50 | 2.59 | 1.90 | KP                                | 1.48 | 2.41 | 1.73 | 3.01  |
| InSe                             | 0.66 | 1.74 | 1.63 | 1.22 | KP <sub>15</sub>                  | 1.52 | 2.45 | 1.77 | 2.52  |
| Ir <sub>2</sub> S <sub>3</sub>   | 1.15 | 1.38 | 1.73 | 0.92 | KPb                               | 0.37 | 1.43 | 2.11 | 0.80  |
| IrBr <sub>3</sub>                | 1.63 | 2.31 | 2.64 | 2.14 | KrF <sub>2</sub>                  | 2.85 | 6.34 | 4.07 | 8.08  |
| IrCl <sub>3</sub>                | 1.94 | 2.83 | 3.17 | 2.56 | KS                                | 1.67 | 3.19 | 1.95 | 3.60  |
| IrF <sub>3</sub>                 | 1.17 | 3.17 | 3.22 | 3.42 | KS <sub>3</sub>                   | 1.80 | 3.33 | 2.24 | 3.50  |
| IrF <sub>6</sub>                 | 0.78 | 2.84 | 2.82 | 4.32 | KSb                               | 0.88 | 1.54 | 2.22 | 1.90  |
| IrI <sub>3</sub>                 | 1.40 | 1.70 | 2.08 | 1.70 | KSb <sub>2</sub>                  | 0.27 | 0.89 | 1.71 | 1.48  |
| IrS <sub>2</sub>                 | 0.56 | 0.89 | 1.12 | 1.04 | KSe                               | 0.98 | 2.40 | 2.64 | 2.84  |
| IrSe <sub>2</sub>                | 0.07 | 0.42 | 0.57 | 0.70 | KSi                               | 1.26 | 1.71 | 1.66 | 1.65  |
| K <sub>2</sub> Ga <sub>3</sub>   | 0.28 | 0.50 | 1.46 | 0    | KSn                               | 0.73 | 1.24 | 2.09 | 1.03  |
| K <sub>2</sub> O                 | 1.72 | 4.42 | 2.79 | 4.88 | KTe                               | 0.67 | 1.40 | 2.18 | 2.31  |
| K <sub>2</sub> O <sub>2</sub>    | 2.40 | 5.15 | 3.20 | 5.08 | La <sub>10</sub> S <sub>19</sub>  | 0.72 | 2.67 | 2.44 | 1.41  |
| K <sub>2</sub> P <sub>3</sub>    | 1.09 | 1.99 | 2.14 | 2.47 | La <sub>10</sub> Se <sub>19</sub> | 0.57 | 2.48 | 2.25 | 1.16  |
| K <sub>2</sub> S                 | 2.32 | 3.89 | 3.86 | 3.95 | La <sub>2</sub> I <sub>5</sub>    | 0.18 | 2.26 | 1.95 | 1.98  |
| K <sub>2</sub> S <sub>3</sub>    | 1.32 | 2.81 | 2.31 | 3.05 | La <sub>2</sub> O <sub>3</sub>    | 3.59 | 6.51 | 6.34 | 4.11  |
| La <sub>2</sub> S <sub>3</sub>   | 1.04 | 2.97 | 2.77 | 1.86 | Lu <sub>2</sub> Te <sub>3</sub>   | 0.59 | 1.78 | 1.33 | 1.24  |
| La <sub>2</sub> Se <sub>3</sub>  | 1.54 | 3.41 | 2.34 | 1.90 | LuBr <sub>3</sub>                 | 3.10 | 3.85 | 3.62 | 4.11  |
| La <sub>2</sub> Te <sub>3</sub>  | 1.00 | 2.24 | 2.23 | 1.41 | LuCl <sub>3</sub>                 | 3.85 | 4.48 | 4.25 | 4.92  |
| La <sub>4</sub> Pb <sub>3</sub>  | 0.05 | 1.68 | 1.48 | 0    | LuF <sub>3</sub>                  | 7.69 | 7.67 | 7.25 | 8.51  |
| La <sub>7</sub> Ru <sub>3</sub>  | 0.04 | 1.48 | 1.33 | 0    | LuH <sub>3</sub>                  | 0.11 | 1.44 | 1.17 | 3.82  |
| LaAs                             | 0.04 | 1.45 | 1.31 | 1.00 | LuI <sub>3</sub>                  | 2.18 | 3.07 | 1.80 | 3.15  |



|                                 |      |       |       |       |                      |      |      |      |      |
|---------------------------------|------|-------|-------|-------|----------------------|------|------|------|------|
| LaBr <sub>2</sub>               | 0.59 | 3.05  | 2.70  | 2.73  | LuMg <sub>149</sub>  | 0.33 | 1.63 | 0.36 | 0.93 |
| LaBr <sub>3</sub>               | 2.93 | 5.28  | 5.07  | 3.94  | LuN                  | 0.38 | 1.88 | 2.20 | 2.64 |
| LaCl <sub>3</sub>               | 3.67 | 6.24  | 6.13  | 4.73  | Mg <sub>149</sub> Ag | 0.57 | 0.86 | 1.38 | 0    |
| LaF <sub>3</sub>                | 6.02 | 9.49  | 9.45  | 7.53  | Mg <sub>149</sub> Al | 0.50 | 0.22 | 0.97 | 0    |
| LaI <sub>3</sub>                | 2.07 | 4.07  | 2.70  | 3.02  | Mg <sub>149</sub> Au | 0.56 | 1.81 | 2.01 | 0.14 |
| LaN                             | 1.15 | 3.68  | 3.26  | 3.04  | Mg <sub>149</sub> Be | 0.53 | 0.17 | 0.96 | 0.52 |
| LaP <sub>2</sub>                | 0.63 | 2.03  | 1.93  | 1.55  | Mg <sub>149</sub> Bi | 0.29 | 0.74 | 1.18 | 0.62 |
| LaP <sub>5</sub>                | 0.11 | 1.53  | 1.39  | 1.82  | Mg <sub>149</sub> Br | 0.00 | 1.85 | 1.86 | 3.26 |
| LaP <sub>7</sub>                | 0.87 | 2.26  | 2.19  | 6.37  | Mg <sub>149</sub> Cd | 0.57 | 0.44 | 1.13 | 0.40 |
| LaS <sub>2</sub>                | 0.66 | 2.61  | 2.38  | 1.87  | Mg <sub>149</sub> Cl | 0.12 | 2.23 | 2.19 | 3.91 |
| LaSe <sub>2</sub>               | 0.28 | 2.21  | 1.95  | 1.48  | Mg <sub>149</sub> Cr | 0.02 | 0    | 0.53 | 0    |
| LaTe <sub>2</sub>               | 0.11 | 1.40  | 1.30  | 1.15  | Mg <sub>149</sub> Fe | 0.08 | 0.20 | 0.76 | 0    |
| Li <sub>2</sub> O               | 4.99 | 7.80  | 7.93  | 8.07  | Mg <sub>149</sub> Ga | 0.48 | 0.57 | 1.16 | 0    |
| Li <sub>2</sub> O <sub>2</sub>  | 2.02 | 4.60  | 2.64  | 5.53  | Mg <sub>149</sub> H  | 0.04 | 0.78 | 1.11 | 0    |
| Li <sub>2</sub> S               | 3.54 | 5.03  | 5.51  | 5.42  | Mg <sub>149</sub> Hg | 0.57 | 0.98 | 1.45 | 0.74 |
| Li <sub>2</sub> Se              | 3.11 | 4.53  | 5.03  | 4.80  | Mg <sub>149</sub> I  | 0.00 | 1.43 | 1.55 | 2.60 |
| Li <sub>2</sub> Te              | 2.52 | 3.20  | 3.94  | 4.00  | Mg <sub>149</sub> In | 0.53 | 0.56 | 1.18 | 0    |
| Li <sub>3</sub> As              | 0.64 | 1.30  | 2.06  | 2.34  | Mg <sub>149</sub> Mn | 0.11 | 0    | 0.50 | 0    |
| Li <sub>3</sub> Bi              | 0.38 | 0.76  | 1.62  | 1.12  | Mg <sub>149</sub> Mo | 0.15 | 0.82 | 1.18 | 0    |
| Li <sub>3</sub> N               | 1.00 | 2.95  | 3.30  | 4.56  | Mg <sub>149</sub> Nb | 0.12 | 0    | 0.56 | 0    |
| Li <sub>3</sub> P               | 0.92 | 1.61  | 2.36  | 2.83  | Mg <sub>149</sub> Ni | 0.02 | 0.28 | 0.78 | 0    |
| Li <sub>3</sub> P <sub>7</sub>  | 1.79 | 2.56  | 2.44  | 5.31  | Mg <sub>149</sub> P  | 0.00 | 0.72 | 1.06 | 1.62 |
| Li <sub>3</sub> Sb              | 0.81 | 1.27  | 2.10  | 1.98  | Mg <sub>149</sub> Pb | 0.38 | 1.32 | 1.60 | 0.43 |
| LiAs                            | 0.36 | 0.99  | 1.76  | 2.35  | Mg <sub>149</sub> Pd | 0.01 | 0.75 | 1.08 | 0    |
| LiB <sub>3</sub>                | 0.09 | 0.48  | 1.34  | 1.05  | Mg <sub>149</sub> Pt | 0.02 | 0.88 | 1.17 | 0    |
| LiBr                            | 4.94 | 7.09  | 7.37  | 8.16  | Mg <sub>149</sub> Re | 0.11 | 0.36 | 0.87 | 0    |
| LiCl                            | 5.93 | 8.43  | 8.62  | 9.58  | Mg <sub>149</sub> Rh | 0.04 | 0.91 | 1.20 | 0    |
| LiF                             | 8.72 | 12.53 | 12.40 | 14.21 | Mg <sub>149</sub> Ru | 0.07 | 0.80 | 1.13 | 0    |
| LiH                             | 3.18 | 4.07  | 4.73  | 16.20 | Mg <sub>149</sub> S  | 0.16 | 1.47 | 1.63 | 2.16 |
| LiI                             | 4.38 | 6.06  | 6.48  | 6.99  | Mg <sub>149</sub> Sb | 0.27 | 0.76 | 1.19 | 1.10 |
| LiN <sub>3</sub>                | 3.66 | 5.83  | 6.12  | 6.27  | Mg <sub>149</sub> Sc | 0.25 | 0    | 0.45 | 0    |
| LiP                             | 0.85 | 1.55  | 2.29  | 3.00  | Mg <sub>149</sub> Se | 0.17 | 1.44 | 1.61 | 1.91 |
| LiP <sub>7</sub>                | 1.66 | 2.41  | 2.02  | 8.00  | Mg <sub>149</sub> Si | 0.34 | 0.59 | 1.11 | 0.64 |
| LiS <sub>4</sub>                | 2.16 | 3.55  | 3.19  | 4.35  | Mg <sub>149</sub> Sn | 0.42 | 0.76 | 1.25 | 0.43 |
| Lu <sub>2</sub> O <sub>3</sub>  | 4.03 | 4.73  | 4.65  | 4.39  | Mg <sub>149</sub> Ta | 0.15 | 0    | 0.49 | 0    |
| Lu <sub>2</sub> S <sub>3</sub>  | 2.66 | 3.40  | 2.99  | 2.67  | Mg <sub>149</sub> Tc | 0.10 | 0.34 | 0.85 | 0    |
| Lu <sub>2</sub> Se <sub>3</sub> | 1.36 | 2.44  | 2.04  | 1.85  | Mg <sub>149</sub> Te | 0.15 | 0.73 | 1.12 | 1.58 |
| Mg <sub>149</sub> Ti            | 0.20 | 0     | 0.58  | 0     | MoF <sub>6</sub>     | 4.17 | 5.92 | 6.40 | 5.50 |
| Mg <sub>149</sub> Tl            | 0.49 | 0.97  | 1.41  | 0     | MoI <sub>2</sub>     | 1.68 | 2.02 | 2.41 | 1.64 |
| Mg <sub>149</sub> V             | 0.08 | 0     | 0.55  | 0     | MoO <sub>2</sub>     | 0.47 | 1.99 | 1.97 | 1.66 |
| Mg <sub>149</sub> Zn            | 0.58 | 0.37  | 1.09  | 0.50  | MoO <sub>3</sub>     | 1.65 | 3.04 | 3.20 | 2.23 |
| Mg <sub>149</sub> Zr            | 0.03 | 0     | 0.19  | 0     | MoS <sub>2</sub>     | 1.46 | 1.71 | 2.11 | 1.34 |
| Mg <sub>2</sub> Ge              | 0.25 | 0.68  | 1.13  | 0.73  | MoSe <sub>2</sub>    | 1.59 | 1.78 | 2.21 | 1.25 |
| Mg <sub>2</sub> Si              | 0.29 | 0.54  | 1.06  | 0.84  | N <sub>2</sub> O     | 6.24 | 5.53 | 7.08 | 7.63 |

|                                 |      |      |       |       |                                 |      |      |      |       |
|---------------------------------|------|------|-------|-------|---------------------------------|------|------|------|-------|
| Mg <sub>3</sub> As <sub>2</sub> | 1.43 | 2.13 | 2.29  | 2.35  | N <sub>2</sub> O <sub>5</sub>   | 0.69 | 1.09 | 1.27 | 4.09  |
| Mg <sub>3</sub> N <sub>2</sub>  | 1.51 | 3.46 | 3.11  | 4.20  | Na <sub>2</sub> O               | 2.04 | 4.66 | 2.57 | 5.84  |
| Mg <sub>3</sub> P <sub>2</sub>  | 1.61 | 2.33 | 2.12  | 2.72  | Na <sub>2</sub> O <sub>2</sub>  | 1.77 | 4.37 | 2.85 | 5.42  |
| Mg <sub>3</sub> Sb <sub>2</sub> | 0.16 | 0.65 | 1.07  | 1.17  | Na <sub>2</sub> S               | 2.44 | 3.90 | 4.12 | 4.62  |
| MgAs <sub>4</sub>               | 0.84 | 1.54 | 1.92  | 2.61  | Na <sub>2</sub> S <sub>5</sub>  | 1.80 | 3.21 | 2.10 | 4.01  |
| MgB <sub>4</sub>                | 0.37 | 0.84 | 1.28  | 1.45  | Na <sub>2</sub> Se              | 2.28 | 3.69 | 3.65 | 4.21  |
| MgB <sub>7</sub>                | 1.46 | 1.94 | 2.11  | 7.14  | Na <sub>2</sub> Te              | 2.28 | 3.00 | 3.75 | 3.86  |
| MgBr <sub>2</sub>               | 4.46 | 6.30 | 6.53  | 6.61  | Na <sub>3</sub> As              | 0.06 | 0.73 | 1.51 | 1.95  |
| MgCl <sub>2</sub>               | 5.67 | 7.78 | 8.01  | 7.97  | Na <sub>3</sub> As <sub>7</sub> | 1.42 | 2.20 | 1.90 | 4.61  |
| MgF <sub>2</sub>                | 6.83 | 9.99 | 10.08 | 10.90 | Na <sub>3</sub> P               | 0.40 | 1.12 | 1.87 | 2.49  |
| MgH <sub>2</sub>                | 3.90 | 4.63 | 5.15  | 12.31 | Na <sub>3</sub> P <sub>11</sub> | 1.97 | 2.80 | 3.05 | 3.20  |
| MgI <sub>2</sub>                | 3.68 | 5.10 | 5.39  | 5.44  | Na <sub>3</sub> Sb              | 0.39 | 0.88 | 1.72 | 1.71  |
| MgO                             | 4.64 | 7.11 | 7.22  | 7.30  | NaAs                            | 0.58 | 1.29 | 2.05 | 2.54  |
| MgP <sub>4</sub>                | 0.67 | 1.39 | 1.75  | 2.79  | NaBr                            | 4.09 | 6.22 | 6.54 | 7.53  |
| MgS                             | 2.96 | 4.27 | 4.57  | 4.65  | NaCl                            | 5.15 | 7.64 | 7.85 | 9.01  |
| MgS <sub>2</sub>                | 1.13 | 2.44 | 2.65  | 3.21  | NaCl <sub>3</sub>               | 2.71 | 5.01 | 4.36 | 6.68  |
| MgSe                            | 2.55 | 3.81 | 4.09  | 4.08  | NaCl <sub>7</sub>               | 0.52 | 2.65 | 3.01 | 6.25  |
| MgTe                            | 2.36 | 2.94 | 3.43  | 3.62  | NaF                             | 6.10 | 9.74 | 9.70 | 12.15 |
| Mn <sub>2</sub> O <sub>3</sub>  | 0.08 | 2.67 | 2.19  | 2.67  | NaGe                            | 1.12 | 1.60 | 2.04 | 1.79  |
| Mn <sub>3</sub> O <sub>4</sub>  | 0.84 | 3.33 | 2.99  | 2.98  | NaH                             | 4.07 | 5.09 | 5.72 | 19.87 |
| Mn <sub>4</sub> Si <sub>7</sub> | 0.80 | 1.20 | 1.34  | 0.40  | NaI                             | 3.57 | 5.24 | 5.68 | 6.38  |
| MnBr <sub>2</sub>               | 1.61 | 3.41 | 3.17  | 3.54  | NaMg <sub>149</sub>             | 0.55 | 0    | 1.10 | 0.22  |
| MnCl <sub>2</sub>               | 1.80 | 3.82 | 3.18  | 4.10  | NaN <sub>3</sub>                | 4.09 | 6.33 | 6.62 | 6.55  |
| MnF <sub>2</sub>                | 2.54 | 5.43 | 3.27  | 6.24  | NaP                             | 0.89 | 1.64 | 2.38 | 3.06  |
| MnF <sub>3</sub>                | 0.51 | 3.67 | 3.21  | 5.19  | NaP <sub>7</sub>                | 1.74 | 2.56 | 2.34 | 7.92  |
| MnF <sub>4</sub>                | 0.20 | 3.40 | 2.88  | 5.16  | NaS                             | 1.26 | 2.63 | 2.49 | 3.84  |
| MnI <sub>2</sub>                | 1.18 | 2.65 | 2.53  | 2.78  | NaS <sub>2</sub>                | 2.04 | 3.47 | 2.86 | 4.23  |
| MnN                             | 0.09 | 2.20 | 1.79  | 2.65  | NaSb                            | 0.65 | 1.15 | 1.98 | 2.10  |
| MnO                             | 0.20 | 2.77 | 2.32  | 2.91  | NaSe                            | 0.49 | 1.76 | 2.35 | 2.96  |
| MnO <sub>2</sub>                | 1.17 | 3.62 | 3.34  | 3.47  | NaSe <sub>2</sub>               | 1.21 | 2.53 | 2.51 | 3.41  |
| MnP <sub>4</sub>                | 0.52 | 1.41 | 1.35  | 2.05  | NaSi                            | 1.42 | 1.75 | 1.64 | 2.10  |
| Mo <sub>8</sub> O <sub>23</sub> | 0.91 | 2.38 | 2.43  | 0.98  | NaSn                            | 0.53 | 0.88 | 1.77 | 1.17  |
| MoBr <sub>2</sub>               | 2.12 | 2.83 | 3.19  | 2.17  | NaTe <sub>3</sub>               | 0.70 | 1.29 | 2.09 | 2.77  |
| MoCl <sub>2</sub>               | 2.47 | 3.40 | 3.12  | 2.61  | Nb <sub>2</sub> F <sub>5</sub>  | 0.16 | 3.17 | 2.79 | 3.81  |
| MoCl <sub>6</sub>               | 1.08 | 2.17 | 2.31  | 3.16  | Nb <sub>2</sub> O <sub>5</sub>  | 1.67 | 3.90 | 3.66 | 2.88  |
| MoF <sub>3</sub>                | 3.64 | 5.46 | 5.14  | 4.22  | Nb <sub>2</sub> Se <sub>9</sub> | 0.80 | 1.95 | 1.97 | 2.63  |
| Nb <sub>3</sub> Br <sub>8</sub> | 0.06 | 1.84 | 1.62  | 3.80  | P <sub>2</sub> O <sub>5</sub>   | 5.20 | 5.74 | 6.89 | 5.77  |
| Nb <sub>3</sub> Cl <sub>7</sub> | 0.98 | 2.92 | 2.79  | 3.10  | P <sub>2</sub> Os               | 0.86 | 0.62 | 1.04 | 0.20  |
| Nb <sub>3</sub> Cl <sub>8</sub> | 0.15 | 2.18 | 1.92  | 4.26  | P <sub>2</sub> Pd               | 0.41 | 0.26 | 0.57 | 0     |
| Nb <sub>3</sub> I <sub>8</sub>  | 0.08 | 1.45 | 1.33  | 3.38  | P <sub>2</sub> Pt               | 1.13 | 0.96 | 1.41 | 0.47  |
| NbBr <sub>4</sub>               | 0.87 | 2.57 | 2.47  | 2.60  | P <sub>2</sub> Rh               | 0.54 | 0.49 | 0.80 | 0     |
| NbBr <sub>5</sub>               | 1.56 | 3.19 | 3.19  | 3.13  | P <sub>2</sub> Ru               | 0.52 | 0.35 | 0.68 | 0     |
| NbCl <sub>4</sub>               | 1.08 | 3.01 | 2.90  | 3.06  | P <sub>2</sub> S <sub>5</sub>   | 2.58 | 2.55 | 3.23 | 3.23  |
| NbCl <sub>5</sub>               | 2.22 | 4.04 | 2.79  | 3.79  | P <sub>2</sub> S <sub>7</sub>   | 2.04 | 2.12 | 2.67 | 4.88  |

|                                   |      |      |      |      |                                 |      |      |      |      |
|-----------------------------------|------|------|------|------|---------------------------------|------|------|------|------|
| NbF <sub>5</sub>                  | 4.58 | 7.17 | 7.42 | 6.29 | P <sub>3</sub> Ir               | 0.09 | 0.01 | 0.24 | 0    |
| NbI <sub>4</sub>                  | 0.49 | 1.82 | 1.75 | 1.99 | P <sub>3</sub> N <sub>5</sub>   | 3.56 | 3.94 | 4.75 | 4.50 |
| NbI <sub>5</sub>                  | 0.99 | 2.28 | 2.28 | 2.43 | P <sub>3</sub> Ru               | 1.03 | 0.76 | 1.22 | 0    |
| NbO <sub>2</sub>                  | 0.30 | 2.66 | 2.37 | 2.30 | P <sub>4</sub> Os               | 1.30 | 0.98 | 1.51 | 0.17 |
| NCl <sub>3</sub>                  | 2.16 | 1.92 | 2.52 | 5.38 | P <sub>4</sub> Ru               | 1.12 | 0.84 | 1.32 | 0    |
| Nd <sub>10</sub> S <sub>19</sub>  | 0.50 | 1.80 | 1.79 | 1.33 | P <sub>4</sub> S <sub>3</sub>   | 2.87 | 2.78 | 3.54 | 2.83 |
| Nd <sub>10</sub> Se <sub>19</sub> | 0.28 | 1.62 | 1.69 | 1.06 | P <sub>4</sub> S <sub>7</sub>   | 2.78 | 2.71 | 3.45 | 4.19 |
| Nd <sub>2</sub> O <sub>3</sub>    | 3.71 | 4.64 | 3.65 | 4.17 | P <sub>4</sub> S <sub>9</sub>   | 2.72 | 2.66 | 3.39 | 3.96 |
| Nd <sub>2</sub> S <sub>3</sub>    | 0.76 | 2.00 | 1.87 | 1.73 | P <sub>7</sub> Pb               | 0.89 | 0.84 | 1.21 | 0.28 |
| Nd <sub>2</sub> Se <sub>3</sub>   | 1.43 | 2.50 | 1.43 | 1.85 | PaBr <sub>4</sub>               | 0.19 | 2.75 | 1.71 | 3.63 |
| Nd <sub>2</sub> Te <sub>3</sub>   | 0.02 | 1.30 | 1.15 | 0.95 | PaBr <sub>5</sub>               | 1.96 | 4.12 | 1.21 | 4.86 |
| NdBr <sub>3</sub>                 | 2.92 | 3.81 | 2.83 | 3.95 | PaCl <sub>4</sub>               | 0.16 | 2.96 | 1.91 | 4.14 |
| NdCl <sub>3</sub>                 | 4.30 | 4.96 | 3.53 | 5.06 | PaCl <sub>5</sub>               | 2.42 | 4.71 | 0.96 | 5.65 |
| NdF <sub>3</sub>                  | 7.81 | 8.07 | 5.44 | 8.43 | Pb <sub>3</sub> O <sub>4</sub>  | 1.15 | 2.30 | 2.50 | 1.57 |
| NdH <sub>3</sub>                  | 0.08 | 1.36 | 1.27 | 3.21 | PbBr <sub>2</sub>               | 2.73 | 2.97 | 3.18 | 2.53 |
| NdI <sub>3</sub>                  | 2.02 | 3.00 | 0.99 | 3.00 | PbCl <sub>2</sub>               | 3.37 | 3.74 | 4.53 | 3.10 |
| NdMg <sub>149</sub>               | 0.19 | 1.47 | 0.37 | 0.65 | PbCl <sub>4</sub>               | 2.15 | 2.76 | 3.25 | 2.83 |
| NdN                               | 0.43 | 1.93 | 2.25 | 2.60 | PbF <sub>2</sub>                | 4.44 | 5.57 | 6.51 | 4.71 |
| NdO <sub>2</sub>                  | 3.51 | 4.49 | 3.59 | 4.37 | PbF <sub>3</sub>                | 2.09 | 3.67 | 4.05 | 3.78 |
| NdP <sub>5</sub>                  | 0.06 | 1.35 | 1.25 | 1.82 | PbF <sub>4</sub>                | 2.00 | 3.60 | 3.95 | 3.93 |
| NdS <sub>2</sub>                  | 0.49 | 1.79 | 1.79 | 1.79 | PbI <sub>2</sub>                | 2.41 | 2.31 | 2.83 | 2.05 |
| NF <sub>2</sub>                   | 1.90 | 2.71 | 3.10 | 7.22 | PbO                             | 1.54 | 2.61 | 2.91 | 2.28 |
| Ni <sub>3</sub> O <sub>4</sub>    | 0.40 | 2.34 | 2.15 | 2.34 | PbO <sub>2</sub>                | 0.01 | 1.38 | 1.31 | 1.57 |
| NiBr <sub>2</sub>                 | 0.48 | 1.81 | 1.73 | 2.54 | PBr <sub>3</sub>                | 3.35 | 3.67 | 4.44 | 4.80 |
| NiF <sub>2</sub>                  | 4.91 | 6.73 | 7.44 | 6.85 | PBr <sub>5</sub>                | 1.64 | 2.30 | 2.65 | 4.35 |
| NiO                               | 2.41 | 4.02 | 3.21 | 3.92 | PBr <sub>7</sub>                | 1.24 | 1.98 | 2.24 | 6.05 |
| NiS <sub>2</sub>                  | 0.19 | 1.07 | 1.03 | 1.58 | PbS                             | 0.99 | 1.06 | 1.43 | 1.24 |
| NO <sub>2</sub>                   | 2.86 | 2.83 | 3.55 | 5.42 | PbS <sub>2</sub>                | 0.81 | 0.91 | 1.24 | 1.15 |
| NpCl <sub>3</sub>                 | 0.01 | 2.42 | 2.02 | 4.55 | PbSe                            | 0.91 | 0.95 | 1.31 | 1.05 |
| NpF <sub>6</sub>                  | 1.15 | 3.69 | 3.26 | 8.18 | PCl <sub>3</sub>                | 4.08 | 4.50 | 5.42 | 5.67 |
| OF <sub>2</sub>                   | 2.13 | 2.54 | 2.92 | 7.46 | PCl <sub>5</sub>                | 1.79 | 2.68 | 3.03 | 4.91 |
| OsF <sub>5</sub>                  | 0.72 | 2.79 | 2.75 | 3.73 | PdBr <sub>2</sub>               | 0.94 | 1.73 | 1.92 | 1.92 |
| OsO <sub>4</sub>                  | 3.30 | 4.36 | 4.59 | 3.16 | PdCl <sub>2</sub>               | 1.43 | 2.39 | 2.64 | 2.45 |
| OsSe <sub>2</sub>                 | 0.58 | 0.85 | 1.11 | 0.91 | PdF <sub>4</sub>                | 0.79 | 2.84 | 2.82 | 3.68 |
| P <sub>2</sub> Ir                 | 0.78 | 0.56 | 0.96 | 0.17 | PdI <sub>2</sub>                | 0.96 | 1.33 | 1.62 | 1.56 |
| PdS                               | 0.01 | 0.43 | 0.54 | 0.81 | PtI <sub>4</sub>                | 0.69 | 0.99 | 1.26 | 1.67 |
| PdS <sub>2</sub>                  | 0.65 | 0.97 | 1.22 | 1.19 | PtO <sub>2</sub>                | 0.66 | 1.99 | 2.04 | 1.89 |
| PdSe <sub>2</sub>                 | 0.01 | 0.39 | 0.51 | 0.77 | PtS                             | 0.47 | 0.70 | 0.94 | 0.99 |
| PF <sub>5</sub>                   | 7.11 | 7.87 | 9.45 | 9.60 | PtS <sub>2</sub>                | 1.44 | 1.51 | 1.96 | 1.46 |
| PI <sub>2</sub>                   | 2.06 | 2.24 | 2.78 | 3.47 | PtSe <sub>2</sub>               | 0.67 | 0.82 | 1.12 | 0.99 |
| PI <sub>3</sub>                   | 2.36 | 2.48 | 2.74 | 3.70 | PuF <sub>3</sub>                | 0.00 | 2.48 | 2.96 | 6.99 |
| Pm <sub>2</sub> O <sub>3</sub>    | 3.78 | 4.57 | 3.81 | 4.25 | Rb <sub>2</sub> As <sub>3</sub> | 0.64 | 1.49 | 2.23 | 1.74 |
| Pm <sub>2</sub> S <sub>3</sub>    | 2.57 | 3.28 | 2.49 | 2.62 | Rb <sub>2</sub> O               | 0.48 | 3.09 | 3.38 | 3.61 |
| Pm <sub>2</sub> Se <sub>3</sub>   | 0.50 | 1.68 | 1.79 | 1.44 | Rb <sub>2</sub> O <sub>2</sub>  | 1.84 | 4.55 | 2.67 | 4.34 |

|                                   |      |      |      |      |                                  |      |      |      |       |
|-----------------------------------|------|------|------|------|----------------------------------|------|------|------|-------|
| PmBr <sub>3</sub>                 | 2.89 | 3.67 | 2.86 | 3.98 | Rb <sub>2</sub> P <sub>3</sub>   | 1.07 | 1.96 | 2.17 | 2.19  |
| PmCl <sub>3</sub>                 | 3.54 | 4.26 | 3.44 | 4.73 | Rb <sub>2</sub> S                | 1.99 | 3.54 | 2.83 | 3.39  |
| PmF <sub>3</sub>                  | 5.10 | 5.87 | 4.81 | 7.16 | Rb <sub>2</sub> S <sub>3</sub>   | 1.36 | 2.85 | 2.27 | 2.77  |
| PmI <sub>3</sub>                  | 2.07 | 2.93 | 1.19 | 3.07 | Rb <sub>2</sub> S <sub>5</sub>   | 1.98 | 3.52 | 2.78 | 3.22  |
| PmMg <sub>149</sub>               | 0.20 | 1.37 | 0.39 | 0.63 | Rb <sub>2</sub> Se               | 1.82 | 3.31 | 2.31 | 3.03  |
| PmS <sub>2</sub>                  | 0.46 | 1.67 | 1.80 | 1.80 | Rb <sub>2</sub> Se <sub>3</sub>  | 0.69 | 2.09 | 2.67 | 2.18  |
| Pr <sub>10</sub> S <sub>19</sub>  | 0.51 | 1.83 | 1.79 | 1.25 | Rb <sub>2</sub> Se <sub>5</sub>  | 0.84 | 2.25 | 2.78 | 2.37  |
| Pr <sub>10</sub> Se <sub>19</sub> | 0.31 | 1.67 | 1.70 | 0.99 | Rb <sub>2</sub> Te               | 1.89 | 2.72 | 3.03 | 2.79  |
| Pr <sub>13</sub> Zn <sub>58</sub> | 0.16 | 1.38 | 0.72 | 0    | Rb <sub>2</sub> Te <sub>3</sub>  | 0.74 | 1.47 | 2.24 | 1.91  |
| Pr <sub>2</sub> Br <sub>5</sub>   | 0.29 | 1.81 | 2.12 | 2.43 | Rb <sub>2</sub> Te <sub>5</sub>  | 0.40 | 1.10 | 1.89 | 1.85  |
| Pr <sub>2</sub> I <sub>5</sub>    | 0.13 | 1.57 | 1.77 | 1.87 | Rb <sub>3</sub> As <sub>11</sub> | 1.47 | 2.38 | 1.73 | 1.98  |
| Pr <sub>2</sub> O <sub>3</sub>    | 3.66 | 4.64 | 3.51 | 4.00 | Rb <sub>3</sub> As <sub>7</sub>  | 1.46 | 2.37 | 1.75 | 3.81  |
| Pr <sub>2</sub> S <sub>3</sub>    | 0.78 | 2.04 | 1.85 | 1.65 | Rb <sub>3</sub> P <sub>11</sub>  | 1.93 | 2.90 | 3.05 | 2.40  |
| Pr <sub>2</sub> Se <sub>3</sub>   | 1.43 | 2.53 | 1.37 | 1.76 | Rb <sub>3</sub> Sb               | 0.09 | 0.69 | 1.51 | 0.96  |
| Pr <sub>2</sub> Te <sub>3</sub>   | 0.88 | 1.98 | 1.38 | 1.27 | Rb <sub>4</sub> Pb <sub>9</sub>  | 0.30 | 1.35 | 2.03 | 0.46  |
| Pr <sub>4</sub> Ge <sub>3</sub>   | 0.15 | 1.40 | 1.09 | 0    | RbAs                             | 1.05 | 1.92 | 2.18 | 2.20  |
| PrBr <sub>3</sub>                 | 3.43 | 4.24 | 2.95 | 4.06 | RbAu                             | 0.72 | 2.11 | 2.69 | 0.57  |
| PrCl <sub>3</sub>                 | 4.35 | 5.04 | 3.40 | 4.91 | RbBi                             | 0.38 | 0.95 | 1.79 | 0.89  |
| PrF <sub>3</sub>                  | 7.60 | 7.97 | 5.11 | 8.08 | RbBr                             | 4.37 | 6.64 | 6.95 | 6.42  |
| PrH <sub>3</sub>                  | 0.29 | 1.54 | 1.33 | 3.47 | RbCl                             | 5.02 | 7.60 | 7.83 | 7.40  |
| PrI <sub>3</sub>                  | 1.96 | 2.98 | 0.77 | 2.85 | RbF                              | 5.65 | 9.36 | 9.36 | 9.83  |
| PrMg <sub>149</sub>               | 0.18 | 1.46 | 0.37 | 0.63 | RbF <sub>3</sub>                 | 2.11 | 5.54 | 2.94 | 7.00  |
| PrN                               | 0.41 | 1.94 | 2.24 | 2.48 | RbGa <sub>3</sub>                | 0.62 | 0.87 | 1.82 | 0.27  |
| PrP <sub>5</sub>                  | 0.04 | 1.35 | 1.25 | 1.73 | RbGe                             | 0.92 | 1.52 | 2.14 | 1.16  |
| PrS <sub>2</sub>                  | 0.49 | 1.82 | 1.78 | 1.70 | RbH                              | 3.20 | 4.28 | 4.93 | 15.62 |
| PrSe <sub>2</sub>                 | 0.00 | 1.43 | 1.62 | 1.26 | RbI                              | 3.95 | 5.77 | 6.20 | 5.51  |
| PSe                               | 2.25 | 2.24 | 2.74 | 3.10 | RbI <sub>3</sub>                 | 1.96 | 3.62 | 2.66 | 3.84  |
| Pt <sub>3</sub> I <sub>8</sub>    | 0.80 | 1.08 | 1.37 | 4.24 | RbMg <sub>149</sub>              | 0.02 | 0    | 0.67 | 0     |
| PtBr <sub>3</sub>                 | 0.94 | 1.61 | 1.83 | 1.93 | RbN <sub>3</sub>                 | 4.20 | 6.56 | 6.85 | 5.36  |
| PtCl <sub>2</sub>                 | 1.83 | 2.61 | 2.97 | 2.52 | RbP <sub>15</sub>                | 1.51 | 2.44 | 1.71 | 2.24  |
| PtCl <sub>3</sub>                 | 1.07 | 1.98 | 2.17 | 2.29 | RbPb                             | 0.41 | 1.46 | 2.14 | 0.68  |
| PtF <sub>4</sub>                  | 1.29 | 3.15 | 3.27 | 3.74 | RbS                              | 1.58 | 3.09 | 2.04 | 3.23  |
| PtI <sub>2</sub>                  | 1.25 | 1.46 | 1.84 | 1.60 | RbSb                             | 0.69 | 1.34 | 2.14 | 1.55  |
| PtI <sub>3</sub>                  | 0.42 | 0.77 | 0.97 | 1.37 | RbSb <sub>2</sub>                | 0.31 | 0.93 | 1.75 | 1.31  |
| RbSe                              | 0.92 | 2.34 | 2.69 | 2.53 | SbF <sub>3</sub>                 | 4.54 | 6.05 | 6.91 | 6.57  |
| RbSi                              | 1.35 | 1.81 | 1.57 | 1.52 | SbF <sub>4</sub>                 | 3.44 | 5.17 | 4.63 | 6.18  |
| RbSn                              | 0.74 | 1.25 | 2.11 | 0.88 | SbF <sub>5</sub>                 | 3.68 | 5.36 | 5.38 | 6.59  |
| RbTe                              | 0.61 | 1.33 | 2.11 | 2.02 | SbI <sub>3</sub>                 | 2.21 | 2.61 | 2.75 | 2.98  |
| Re <sub>2</sub> O <sub>7</sub>    | 2.68 | 4.29 | 2.94 | 4.67 | SbO <sub>2</sub>                 | 1.90 | 3.34 | 3.58 | 3.44  |
| Re <sub>2</sub> P <sub>5</sub>    | 0.49 | 0.68 | 0.95 | 1.06 | SBr                              | 2.31 | 2.26 | 2.95 | 3.97  |
| Re <sub>2</sub> Te <sub>5</sub>   | 0.61 | 0.64 | 0.98 | 0.87 | Sc <sub>2</sub> Ni               | 0.01 | 0.45 | 0.72 | 0     |
| Re <sub>3</sub> Br <sub>7</sub>   | 0.36 | 1.67 | 1.62 | 2.06 | Sc <sub>2</sub> O <sub>3</sub>   | 3.81 | 6.25 | 6.30 | 4.39  |
| Re <sub>4</sub> Si <sub>7</sub>   | 0.03 | 0    | 0.16 | 0    | Sc <sub>2</sub> Pd               | 0.01 | 0.92 | 1.03 | 0     |
| ReCl <sub>3</sub>                 | 0.97 | 2.46 | 2.47 | 2.46 | Sc <sub>2</sub> S <sub>3</sub>   | 1.07 | 2.48 | 2.53 | 1.98  |

|                                 |      |      |       |       |                                   |      |      |      |      |
|---------------------------------|------|------|-------|-------|-----------------------------------|------|------|------|------|
| ReF <sub>7</sub>                | 2.00 | 4.34 | 4.20  | 6.30  | Sc <sub>2</sub> Se <sub>3</sub>   | 0.66 | 2.05 | 2.07 | 1.57 |
| ReI <sub>3</sub>                | 0.96 | 1.78 | 1.93  | 1.73  | Sc <sub>2</sub> Te <sub>3</sub>   | 0.04 | 0.78 | 0.95 | 1.03 |
| ReP <sub>4</sub>                | 0.76 | 0.92 | 1.23  | 1.51  | Sc <sub>4</sub> C <sub>3</sub>    | 0.47 | 1.87 | 1.87 | 1.08 |
| ReS <sub>2</sub>                | 1.45 | 2.10 | 2.36  | 1.59  | Sc <sub>57</sub> Pt <sub>13</sub> | 0.10 | 1.12 | 1.20 | 0    |
| ReSe <sub>2</sub>               | 1.24 | 1.87 | 2.11  | 1.35  | Sc <sub>57</sub> Ru <sub>13</sub> | 0.02 | 0.92 | 1.03 | 0    |
| Rh <sub>2</sub> S <sub>3</sub>  | 0.19 | 0.45 | 0.65  | 0.60  | ScBr <sub>3</sub>                 | 2.25 | 4.13 | 2.68 | 3.80 |
| RhBr <sub>3</sub>               | 1.31 | 1.93 | 2.22  | 2.08  | ScCl <sub>3</sub>                 | 3.88 | 5.95 | 6.08 | 5.07 |
| RhCl <sub>3</sub>               | 1.56 | 2.40 | 2.69  | 2.48  | ScF <sub>3</sub>                  | 6.11 | 9.10 | 9.27 | 7.90 |
| RhF <sub>3</sub>                | 0.89 | 2.83 | 2.85  | 3.40  | ScI <sub>3</sub>                  | 1.70 | 3.20 | 2.56 | 3.00 |
| RhF <sub>6</sub>                | 0.88 | 2.82 | 2.84  | 4.48  | SCl                               | 2.89 | 2.98 | 3.20 | 4.80 |
| RhI <sub>3</sub>                | 1.06 | 1.30 | 1.64  | 1.62  | SCl <sub>4</sub>                  | 2.62 | 2.76 | 3.40 | 4.67 |
| RuF <sub>4</sub>                | 0.19 | 2.34 | 2.19  | 3.22  | ScN                               | 0.33 | 2.40 | 2.23 | 2.69 |
| RuO <sub>4</sub>                | 2.43 | 3.61 | 3.50  | 2.84  | Se <sub>2</sub> O <sub>5</sub>    | 3.02 | 3.47 | 3.36 | 3.93 |
| RuS <sub>2</sub>                | 0.68 | 0.98 | 1.25  | 1.09  | SeBr <sub>4</sub>                 | 2.21 | 2.22 | 2.88 | 3.70 |
| RuSe <sub>2</sub>               | 0.48 | 0.76 | 1.00  | 0.87  | SeCl <sub>4</sub>                 | 3.04 | 3.14 | 3.70 | 4.51 |
| S <sub>7</sub> N                | 0.65 | 1.05 | 1.29  | 2.23  | SeF <sub>4</sub>                  | 4.14 | 4.98 | 5.97 | 6.61 |
| S <sub>8</sub> O                | 2.42 | 2.95 | 3.57  | 3.55  | SeO <sub>2</sub>                  | 3.36 | 3.73 | 4.40 | 4.20 |
| Sb <sub>2</sub> F <sub>7</sub>  | 3.83 | 5.48 | 5.85  | 7.19  | SeS <sub>7</sub>                  | 1.90 | 1.46 | 2.15 | 7.31 |
| Sb <sub>2</sub> Ir              | 0.45 | 0.55 | 0.76  | 0     | SF <sub>4</sub>                   | 4.88 | 5.53 | 6.71 | 7.51 |
| Sb <sub>2</sub> O <sub>3</sub>  | 2.23 | 3.60 | 3.54  | 3.22  | SF <sub>6</sub>                   | 5.91 | 6.35 | 7.79 | 9.17 |
| Sb <sub>2</sub> O <sub>5</sub>  | 0.79 | 2.45 | 2.42  | 2.86  | Si <sub>2</sub> Os                | 0.65 | 1.00 | 1.13 | 0    |
| Sb <sub>2</sub> Os              | 0.40 | 0.52 | 0.71  | 0     | Si <sub>2</sub> Ru                | 0.48 | 0.86 | 0.95 | 0    |
| Sb <sub>2</sub> Rh              | 0.00 | 0.32 | 0.38  | 0     | Si <sub>3</sub> N <sub>4</sub>    | 4.26 | 5.03 | 5.78 | 4.20 |
| Sb <sub>2</sub> Ru              | 0.09 | 0.26 | 0.38  | 0     | Si <sub>3</sub> Os <sub>2</sub>   | 0.86 | 1.17 | 1.34 | 0    |
| Sb <sub>2</sub> S <sub>3</sub>  | 1.31 | 1.78 | 2.06  | 1.78  | Si <sub>3</sub> Ru <sub>2</sub>   | 0.55 | 0.92 | 1.02 | 0    |
| Sb <sub>2</sub> Se <sub>3</sub> | 0.86 | 1.38 | 1.55  | 1.38  | Si <sub>5</sub> Ir <sub>3</sub>   | 0.93 | 1.23 | 1.43 | 0    |
| Sb <sub>2</sub> Te <sub>3</sub> | 0.16 | 0.17 | 0.35  | 0.83  | Si <sub>7</sub> Tc <sub>4</sub>   | 1.07 | 0.86 | 1.25 | 0.89 |
| Sb <sub>3</sub> Ir              | 0.53 | 0.61 | 0.84  | 0     | SiAs                              | 1.48 | 1.64 | 1.98 | 2.05 |
| Sb <sub>3</sub> Rh              | 0.23 | 0.49 | 0.61  | 0     | SiAs <sub>2</sub>                 | 0.90 | 1.17 | 1.36 | 1.67 |
| Sb <sub>7</sub> F <sub>29</sub> | 3.60 | 5.30 | 5.11  | 4.94  | SiB <sub>3</sub>                  | 1.49 | 1.43 | 1.84 | 1.38 |
| SbBr <sub>3</sub>               | 3.45 | 3.99 | 4.70  | 4.07  | SiBr <sub>4</sub>                 | 4.11 | 4.81 | 5.54 | 4.89 |
| SbCl <sub>3</sub>               | 3.75 | 4.48 | 5.22  | 4.62  | SiC                               | 2.04 | 2.62 | 2.65 | 2.51 |
| SbCl <sub>5</sub>               | 1.84 | 2.95 | 3.22  | 4.14  | SiCl <sub>4</sub>                 | 5.79 | 6.41 | 7.51 | 6.17 |
| SiF <sub>4</sub>                | 7.94 | 9.08 | 10.62 | 8.95  | SO <sub>3</sub>                   | 5.14 | 5.11 | 6.42 | 5.48 |
| SiH <sub>8</sub>                | 7.35 | 6.39 | 8.14  | 10.39 | Sr <sub>2</sub> Ge                | 0.37 | 1.46 | 1.64 | 0.72 |
| SiI <sub>3</sub>                | 2.96 | 3.50 | 4.02  | 3.66  | Sr <sub>2</sub> Pb                | 0.04 | 1.61 | 1.62 | 0.34 |
| SiI <sub>4</sub>                | 2.86 | 3.42 | 3.92  | 3.74  | Sr <sub>2</sub> Sb <sub>3</sub>   | 0.13 | 1.28 | 1.42 | 1.16 |
| SiO <sub>2</sub>                | 5.85 | 6.79 | 7.87  | 5.81  | Sr <sub>2</sub> Si                | 0.34 | 1.26 | 1.49 | 0.77 |
| SiP                             | 1.82 | 1.92 | 2.34  | 2.46  | Sr <sub>2</sub> Sn                | 0.15 | 1.16 | 1.35 | 0.39 |
| SiP <sub>2</sub>                | 1.49 | 1.66 | 1.99  | 2.17  | Sr <sub>3</sub> As <sub>4</sub>   | 0.68 | 2.03 | 2.13 | 1.83 |
| SiRu                            | 0.25 | 0.68 | 0.71  | 0.18  | Sr <sub>3</sub> P <sub>14</sub>   | 1.82 | 3.18 | 2.57 | 2.33 |
| SiS <sub>2</sub>                | 3.14 | 3.54 | 4.13  | 3.31  | Sr <sub>3</sub> P <sub>2</sub>    | 0.14 | 1.50 | 1.58 | 1.73 |
| SiSe <sub>2</sub>               | 2.18 | 2.73 | 2.51  | 2.60  | Sr <sub>3</sub> P <sub>4</sub>    | 0.89 | 2.25 | 2.36 | 2.18 |
| Sm <sub>2</sub> O <sub>3</sub>  | 3.88 | 4.74 | 3.92  | 4.11  | Sr <sub>4</sub> As <sub>3</sub>   | 0.59 | 1.93 | 2.03 | 1.70 |

|                                 |      |      |      |      |                                  |      |       |       |       |
|---------------------------------|------|------|------|------|----------------------------------|------|-------|-------|-------|
| Sm <sub>2</sub> S <sub>3</sub>  | 0.74 | 1.99 | 1.88 | 1.64 | SrAs                             | 0.02 | 1.37  | 1.44  | 1.61  |
| Sm <sub>2</sub> Se <sub>3</sub> | 0.51 | 1.80 | 1.76 | 1.34 | SrB <sub>6</sub>                 | 0.04 | 1.17  | 1.31  | 4.26  |
| Sm <sub>2</sub> Te <sub>3</sub> | 0.92 | 2.00 | 1.44 | 1.29 | SrBr <sub>2</sub>                | 4.47 | 6.90  | 6.92  | 6.21  |
| SmBr <sub>3</sub>               | 2.93 | 3.80 | 3.01 | 3.83 | SrCl <sub>2</sub>                | 5.23 | 7.92  | 7.92  | 7.21  |
| SmCl <sub>3</sub>               | 3.59 | 4.39 | 3.52 | 4.56 | SrF <sub>2</sub>                 | 6.78 | 10.48 | 10.40 | 10.21 |
| SmF <sub>3</sub>                | 7.86 | 8.05 | 5.94 | 8.24 | SrGe <sub>2</sub>                | 0.40 | 1.49  | 1.66  | 0.92  |
| SmH <sub>3</sub>                | 0.13 | 1.42 | 1.26 | 3.42 | SrH <sub>2</sub>                 | 3.24 | 4.61  | 4.83  | 9.31  |
| SmI <sub>3</sub>                | 2.12 | 3.07 | 1.33 | 2.94 | SrI <sub>2</sub>                 | 3.80 | 5.83  | 5.90  | 5.17  |
| SmMg <sub>149</sub>             | 0.21 | 1.51 | 0.36 | 0.71 | SrN <sub>6</sub>                 | 3.67 | 6.20  | 6.16  | 6.53  |
| SmN                             | 0.02 | 1.62 | 2.10 | 2.25 | SrO                              | 3.45 | 6.49  | 6.35  | 6.03  |
| SmP <sub>5</sub>                | 0.06 | 1.37 | 1.22 | 1.77 | SrO <sub>2</sub>                 | 2.91 | 5.95  | 4.66  | 5.31  |
| SmS <sub>2</sub>                | 0.54 | 1.84 | 1.81 | 1.73 | SrP                              | 0.75 | 2.11  | 2.21  | 2.36  |
| Sn <sub>3</sub> F <sub>8</sub>  | 3.22 | 5.17 | 4.03 | 8.80 | SrP <sub>2</sub>                 | 0.81 | 2.17  | 2.28  | 2.35  |
| Sn <sub>3</sub> N <sub>4</sub>  | 0.47 | 1.87 | 1.76 | 1.93 | SrP <sub>3</sub>                 | 0.38 | 1.74  | 1.83  | 2.18  |
| Sn <sub>5</sub> O <sub>6</sub>  | 1.77 | 3.39 | 3.53 | 2.76 | SrS                              | 2.56 | 4.48  | 4.48  | 4.07  |
| SnBr <sub>2</sub>               | 2.20 | 3.16 | 2.98 | 3.08 | SrS <sub>3</sub>                 | 1.29 | 3.21  | 2.48  | 3.07  |
| SnBr <sub>4</sub>               | 2.71 | 3.57 | 3.50 | 3.50 | SrSe                             | 2.29 | 4.17  | 3.67  | 3.63  |
| SnCl <sub>2</sub>               | 3.11 | 4.14 | 4.53 | 3.91 | SrTe                             | 2.04 | 3.27  | 3.36  | 3.16  |
| SnCl <sub>4</sub>               | 3.69 | 4.60 | 5.25 | 4.31 | Ta <sub>2</sub> O <sub>5</sub>   | 2.29 | 4.64  | 2.91  | 3.41  |
| SnF <sub>2</sub>                | 3.27 | 5.21 | 4.20 | 5.44 | Ta <sub>3</sub> Br <sub>7</sub>  | 1.27 | 3.12  | 2.99  | 3.11  |
| SnF <sub>3</sub>                | 2.92 | 4.93 | 3.29 | 5.28 | Ta <sub>3</sub> I <sub>7</sub>   | 0.89 | 2.37  | 2.28  | 2.43  |
| SnF <sub>4</sub>                | 3.20 | 5.15 | 3.97 | 5.55 | Ta <sub>3</sub> N <sub>5</sub>   | 1.26 | 3.21  | 3.06  | 2.62  |
| SnI <sub>2</sub>                | 1.83 | 2.48 | 2.79 | 2.46 | TaBr <sub>5</sub>                | 2.03 | 3.81  | 2.67  | 3.58  |
| SnI <sub>4</sub>                | 2.03 | 2.63 | 2.85 | 2.75 | TaCl <sub>5</sub>                | 2.82 | 4.77  | 4.12  | 4.34  |
| SnO                             | 0.63 | 2.48 | 2.34 | 2.49 | TaF <sub>5</sub>                 | 5.56 | 8.22  | 8.54  | 7.16  |
| SnO <sub>2</sub>                | 1.41 | 3.10 | 3.16 | 2.87 | TaI <sub>5</sub>                 | 1.17 | 2.63  | 2.58  | 2.70  |
| SnS                             | 1.11 | 1.79 | 1.95 | 1.83 | Tb <sub>2</sub> Cl <sub>3</sub>  | 0.87 | 2.27  | 2.57  | 3.06  |
| SnS <sub>2</sub>                | 1.56 | 2.15 | 2.42 | 2.00 | Tb <sub>2</sub> O <sub>3</sub>   | 3.91 | 4.69  | 4.21  | 4.20  |
| SnSe                            | 0.82 | 1.51 | 1.61 | 1.49 | Tb <sub>2</sub> S <sub>3</sub>   | 0.58 | 1.84  | 1.83  | 1.60  |
| SnSe <sub>2</sub>               | 0.80 | 1.50 | 1.59 | 1.47 | Tb <sub>2</sub> Se <sub>3</sub>  | 0.55 | 1.80  | 1.79  | 1.39  |
| SnTe                            | 0.66 | 0.73 | 0.97 | 1.18 | Tb <sub>2</sub> Te <sub>3</sub>  | 0.79 | 1.88  | 1.43  | 1.27  |
| SO <sub>2</sub>                 | 3.20 | 3.57 | 3.89 | 4.47 | Tb <sub>8</sub> Se <sub>15</sub> | 0.32 | 1.63  | 1.69  | 1.03  |
| TbBr <sub>3</sub>               | 2.86 | 3.69 | 3.03 | 3.86 | ThBr <sub>4</sub>                | 2.95 | 4.58  | 2.49  | 5.36  |
| TbCl <sub>3</sub>               | 4.65 | 5.11 | 4.24 | 5.16 | ThCl <sub>4</sub>                | 3.75 | 5.30  | 2.91  | 6.37  |
| TbF <sub>3</sub>                | 7.95 | 7.99 | 6.56 | 8.40 | ThF <sub>4</sub>                 | 6.54 | 7.87  | 4.38  | 10.06 |
| TbH <sub>3</sub>                | 0.00 | 1.30 | 1.18 | 3.37 | ThI <sub>4</sub>                 | 1.85 | 3.61  | 0.82  | 4.09  |
| TbI <sub>3</sub>                | 2.10 | 3.00 | 1.41 | 2.99 | ThMg <sub>149</sub>              | 0.02 | 0.86  | 0.15  | 1.00  |
| TbMg <sub>149</sub>             | 0.25 | 1.54 | 0.36 | 0.78 | ThO <sub>2</sub>                 | 4.46 | 5.98  | 3.36  | 6.31  |
| TbN                             | 0.19 | 1.71 | 2.14 | 2.41 | ThS <sub>2</sub>                 | 1.03 | 2.95  | 1.70  | 2.94  |
| TbS <sub>2</sub>                | 0.48 | 1.76 | 1.79 | 1.75 | ThSe <sub>2</sub>                | 0.65 | 2.64  | 1.58  | 2.46  |
| Tc <sub>2</sub> O <sub>7</sub>  | 2.67 | 4.29 | 2.94 | 4.67 | ThSe <sub>3</sub>                | 1.50 | 3.30  | 1.36  | 3.01  |
| Tc <sub>2</sub> Te <sub>5</sub> | 0.53 | 0.58 | 0.89 | 0.83 | ThTe <sub>3</sub>                | 1.09 | 2.87  | 1.21  | 2.47  |
| TcBr <sub>3</sub>               | 0.08 | 1.43 | 1.33 | 1.75 | Ti <sub>2</sub> Sn               | 0.05 | 0.38  | 0.62  | 0     |
| TcCl <sub>3</sub>               | 0.68 | 2.20 | 2.16 | 2.33 | TiBr <sub>3</sub>                | 0.02 | 1.82  | 1.64  | 2.37  |

|                                  |      |      |      |      |                                   |      |      |      |      |
|----------------------------------|------|------|------|------|-----------------------------------|------|------|------|------|
| TcCl <sub>4</sub>                | 0.78 | 2.30 | 2.27 | 2.53 | TiBr <sub>4</sub>                 | 2.84 | 4.43 | 4.35 | 3.85 |
| TcF <sub>4</sub>                 | 1.30 | 3.74 | 3.68 | 4.02 | TiCl <sub>3</sub>                 | 0.03 | 2.10 | 1.86 | 2.79 |
| TcP <sub>3</sub>                 | 0.39 | 0.60 | 0.84 | 1.11 | TiCl <sub>4</sub>                 | 3.47 | 5.28 | 5.46 | 4.55 |
| TcP <sub>4</sub>                 | 0.85 | 1.00 | 1.32 | 1.55 | TiF <sub>4</sub>                  | 4.17 | 6.93 | 7.05 | 6.45 |
| TcS <sub>2</sub>                 | 1.18 | 1.87 | 2.08 | 1.48 | TiI <sub>3</sub>                  | 0.20 | 1.58 | 1.52 | 1.98 |
| Te <sub>2</sub> Br               | 0.77 | 1.77 | 1.84 | 2.53 | TiI <sub>4</sub>                  | 1.11 | 2.42 | 2.47 | 2.55 |
| Te <sub>2</sub> I                | 0.66 | 1.29 | 1.41 | 1.96 | TiO <sub>2</sub>                  | 2.69 | 4.91 | 3.38 | 3.79 |
| Te <sub>2</sub> Mo               | 1.86 | 1.53 | 2.14 | 1.61 | TiS <sub>3</sub>                  | 0.23 | 1.50 | 1.47 | 1.67 |
| Te <sub>2</sub> O <sub>5</sub>   | 1.70 | 3.08 | 3.31 | 3.46 | Tl <sub>2</sub> Cl <sub>3</sub>   | 1.77 | 2.92 | 3.16 | 1.99 |
| Te <sub>2</sub> Os               | 0.52 | 0.53 | 0.79 | 0    | Tl <sub>2</sub> O                 | 0.57 | 2.28 | 2.20 | 1.36 |
| Te <sub>2</sub> Ru               | 0.32 | 0.37 | 0.57 | 0    | Tl <sub>2</sub> O <sub>3</sub>    | 0.03 | 1.84 | 1.63 | 1.19 |
| Te <sub>3</sub> As <sub>2</sub>  | 0.58 | 0.54 | 0.83 | 0.91 | Tl <sub>2</sub> S                 | 0.90 | 1.46 | 1.64 | 0.80 |
| Te <sub>4</sub> Mo <sub>3</sub>  | 0.01 | 0.06 | 0.21 | 0    | Tl <sub>2</sub> S <sub>5</sub>    | 1.70 | 2.11 | 2.48 | 1.37 |
| TeBr <sub>4</sub>                | 2.52 | 3.16 | 2.79 | 3.97 | Tl <sub>2</sub> Te                | 0.65 | 0.55 | 0.88 | 0.37 |
| TeCl <sub>4</sub>                | 3.11 | 3.87 | 4.39 | 4.68 | Tl <sub>4</sub> O <sub>3</sub>    | 1.20 | 2.79 | 2.85 | 1.40 |
| TeF <sub>4</sub>                 | 4.02 | 5.53 | 6.31 | 6.77 | TlBr                              | 2.35 | 3.14 | 2.91 | 2.48 |
| TeF <sub>6</sub>                 | 4.40 | 5.83 | 6.70 | 7.88 | TlBr <sub>2</sub>                 | 1.81 | 2.70 | 2.99 | 2.05 |
| TeI                              | 0.73 | 1.35 | 1.49 | 2.31 | TlCl                              | 2.60 | 3.59 | 2.86 | 2.91 |
| TeI <sub>4</sub>                 | 1.76 | 2.17 | 2.57 | 3.10 | TlCl <sub>2</sub>                 | 2.31 | 3.36 | 3.15 | 2.56 |
| TeO <sub>2</sub>                 | 2.24 | 3.51 | 3.59 | 3.80 | TlCl <sub>3</sub>                 | 2.35 | 3.38 | 3.12 | 2.61 |
| TeO <sub>3</sub>                 | 2.16 | 3.45 | 3.67 | 3.83 | TlF                               | 3.26 | 5.08 | 4.08 | 4.40 |
| TePb                             | 1.06 | 1.14 | 1.48 | 0.88 | TlF <sub>3</sub>                  | 1.27 | 3.46 | 3.49 | 3.33 |
| TeSe                             | 0.95 | 1.37 | 1.60 | 1.89 | TlI                               | 2.44 | 2.81 | 2.86 | 2.18 |
| TeSe <sub>2</sub>                | 0.90 | 1.33 | 1.54 | 1.86 | TlI <sub>3</sub>                  | 1.85 | 2.34 | 2.72 | 1.79 |
| Th <sub>2</sub> S <sub>5</sub>   | 2.12 | 3.79 | 0.97 | 3.51 | TlP <sub>5</sub>                  | 1.42 | 1.32 | 1.78 | 2.10 |
| Th <sub>2</sub> Se <sub>5</sub>  | 1.34 | 3.18 | 1.66 | 2.82 | TlSe                              | 0.36 | 0.98 | 1.04 | 0.69 |
| Th <sub>3</sub> As <sub>4</sub>  | 0.28 | 2.26 | 1.12 | 1.62 | Tm <sub>10</sub> S <sub>19</sub>  | 0.53 | 1.83 | 1.80 | 1.27 |
| Th <sub>3</sub> Bi <sub>4</sub>  | 0.21 | 2.18 | 0.93 | 0.68 | Tm <sub>2</sub> O <sub>3</sub>    | 3.99 | 4.72 | 4.51 | 4.23 |
| Th <sub>3</sub> N <sub>4</sub>   | 1.67 | 3.62 | 1.55 | 4.05 | Tm <sub>2</sub> S <sub>3</sub>    | 2.27 | 3.12 | 2.07 | 2.39 |
| Th <sub>3</sub> P <sub>4</sub>   | 0.27 | 2.25 | 1.12 | 1.86 | Tm <sub>2</sub> Se <sub>3</sub>   | 1.37 | 2.44 | 1.96 | 1.77 |
| Th <sub>3</sub> Sb <sub>4</sub>  | 0.17 | 2.15 | 0.96 | 1.14 | Tm <sub>2</sub> Te <sub>3</sub>   | 0.58 | 1.76 | 1.33 | 1.17 |
| TmBr <sub>3</sub>                | 2.99 | 3.78 | 3.49 | 3.93 | XeF <sub>6</sub>                  | 2.79 | 3.80 | 4.11 | 6.92 |
| TmCl <sub>3</sub>                | 5.02 | 5.36 | 4.76 | 5.35 | Y <sub>2</sub> Br <sub>3</sub>    | 0.70 | 2.91 | 2.69 | 2.84 |
| TmF <sub>3</sub>                 | 5.51 | 6.10 | 5.87 | 7.20 | Y <sub>2</sub> Cl <sub>3</sub>    | 0.86 | 3.32 | 3.06 | 3.37 |
| TmH <sub>3</sub>                 | 0.06 | 1.39 | 1.16 | 3.67 | Y <sub>2</sub> O <sub>3</sub>     | 4.11 | 6.77 | 6.75 | 4.65 |
| TmI <sub>3</sub>                 | 2.27 | 3.14 | 1.98 | 3.08 | Y <sub>2</sub> S <sub>3</sub>     | 1.60 | 3.26 | 2.44 | 2.31 |
| TmN                              | 0.31 | 1.83 | 2.17 | 2.49 | Y <sub>2</sub> Se <sub>3</sub>    | 1.35 | 2.98 | 2.66 | 1.99 |
| U <sub>11</sub> Se <sub>20</sub> | 0.00 | 2.31 | 1.36 | 1.94 | Y <sub>2</sub> Te <sub>3</sub>    | 0.79 | 1.79 | 1.89 | 1.46 |
| U <sub>3</sub> O <sub>8</sub>    | 0.03 | 2.68 | 2.30 | 3.67 | Y <sub>4</sub> C <sub>7</sub>     | 0.61 | 2.27 | 2.17 | 1.31 |
| UBr <sub>4</sub>                 | 0.22 | 2.62 | 1.85 | 4.23 | Yb <sub>13</sub> Zn <sub>58</sub> | 0.07 | 0.64 | 0.75 | 0    |
| UBr <sub>5</sub>                 | 0.29 | 2.67 | 1.87 | 4.47 | Yb <sub>2</sub> Ge                | 0.04 | 0.63 | 1.11 | 0.26 |
| UCl <sub>5</sub>                 | 0.33 | 2.79 | 2.10 | 5.08 | Yb <sub>2</sub> Si                | 0.04 | 0.62 | 0.99 | 0.33 |
| UCl <sub>6</sub>                 | 1.58 | 3.75 | 2.05 | 6.25 | Yb <sub>3</sub> N <sub>2</sub>    | 0.49 | 1.27 | 2.43 | 2.84 |
| UF <sub>3</sub>                  | 0.22 | 3.09 | 2.92 | 6.96 | YbB <sub>6</sub>                  | 0.11 | 0.68 | 1.17 | 4.74 |

|                                |      |      |      |      |                                 |      |       |       |      |
|--------------------------------|------|------|------|------|---------------------------------|------|-------|-------|------|
| UF <sub>5</sub>                | 0.75 | 3.50 | 3.08 | 7.60 | YbBr <sub>2</sub>               | 4.88 | 4.47  | 4.71  | 5.73 |
| UF <sub>6</sub>                | 2.80 | 5.08 | 1.22 | 9.30 | YbCl <sub>2</sub>               | 5.40 | 4.93  | 5.21  | 6.50 |
| UI <sub>4</sub>                | 0.26 | 2.54 | 1.55 | 3.57 | YbF <sub>2</sub>                | 6.73 | 6.31  | 6.78  | 9.11 |
| UN <sub>2</sub>                | 0.77 | 3.08 | 2.10 | 4.34 | YbH <sub>2</sub>                | 2.89 | 2.76  | 2.84  | 9.20 |
| UO <sub>3</sub>                | 1.65 | 3.92 | 2.22 | 5.22 | YbI <sub>2</sub>                | 4.01 | 3.72  | 3.93  | 4.67 |
| V <sub>2</sub> O <sub>3</sub>  | 0.49 | 2.78 | 2.54 | 2.44 | YbMg <sub>149</sub>             | 0.49 | 1.02  | 0.62  | 0.57 |
| V <sub>2</sub> O <sub>5</sub>  | 2.34 | 4.45 | 2.99 | 3.52 | YbO                             | 3.53 | 3.68  | 4.49  | 5.42 |
| V <sub>2</sub> Se <sub>9</sub> | 0.77 | 1.86 | 1.90 | 2.85 | YBr <sub>3</sub>                | 4.05 | 6.11  | 6.20  | 4.82 |
| V <sub>3</sub> O <sub>5</sub>  | 1.15 | 3.37 | 3.23 | 2.78 | YbS                             | 2.44 | 2.54  | 2.72  | 3.50 |
| VBr <sub>2</sub>               | 1.19 | 2.80 | 2.77 | 2.86 | YbS <sub>2</sub>                | 1.64 | 1.95  | 1.43  | 2.80 |
| VCl <sub>2</sub>               | 1.26 | 3.12 | 3.05 | 3.31 | YbSe                            | 2.03 | 2.22  | 1.67  | 3.00 |
| VCl <sub>5</sub>               | 1.05 | 2.93 | 2.83 | 3.62 | YbTe                            | 1.53 | 1.74  | 1.11  | 2.39 |
| VF <sub>3</sub>                | 1.64 | 4.46 | 4.29 | 5.10 | YCl <sub>3</sub>                | 4.98 | 7.25  | 7.37  | 5.74 |
| VF <sub>4</sub>                | 2.31 | 5.07 | 3.58 | 5.55 | YF <sub>3</sub>                 | 7.65 | 10.81 | 11.03 | 8.85 |
| VF <sub>5</sub>                | 2.99 | 5.68 | 3.66 | 6.10 | YH <sub>3</sub>                 | 0.01 | 1.19  | 1.17  | 3.46 |
| VI <sub>2</sub>                | 1.11 | 2.32 | 2.37 | 2.35 | YI <sub>3</sub>                 | 3.06 | 4.76  | 4.84  | 3.78 |
| VS <sub>4</sub>                | 0.95 | 2.07 | 2.13 | 2.16 | YMg <sub>149</sub>              | 0.27 | 0     | 0.51  | 0.83 |
| WBr <sub>2</sub>               | 2.47 | 2.88 | 3.12 | 2.08 | YN                              | 0.29 | 2.62  | 2.34  | 2.74 |
| WBr <sub>6</sub>               | 1.13 | 1.70 | 1.95 | 2.78 | Zn <sub>3</sub> As <sub>2</sub> | 0.14 | 1.07  | 0.83  | 1.21 |
| WCl <sub>2</sub>               | 2.83 | 3.47 | 3.24 | 2.49 | Zn <sub>3</sub> N <sub>2</sub>  | 0.43 | 2.45  | 2.04  | 2.99 |
| WCl <sub>4</sub>               | 0.28 | 1.22 | 1.26 | 1.81 | Zn <sub>3</sub> P <sub>2</sub>  | 0.61 | 1.47  | 1.33  | 1.70 |
| WCl <sub>6</sub>               | 1.92 | 2.67 | 2.98 | 3.34 | Zn <sub>6</sub> Ru              | 0.01 | 0.99  | 0.72  | 0    |
| WF <sub>6</sub>                | 5.36 | 6.75 | 7.44 | 5.66 | ZnAs <sub>2</sub>               | 0.22 | 1.14  | 0.92  | 1.69 |
| WI <sub>2</sub>                | 1.96 | 2.01 | 2.50 | 1.56 | ZnBr <sub>2</sub>               | 3.22 | 4.63  | 4.88  | 5.10 |
| WO <sub>3</sub>                | 1.15 | 2.35 | 2.47 | 1.86 | ZnCl <sub>2</sub>               | 4.06 | 5.56  | 5.96  | 6.11 |
| WS <sub>2</sub>                | 1.62 | 1.59 | 2.06 | 1.24 | ZnF <sub>2</sub>                | 3.48 | 6.02  | 5.16  | 7.71 |
| WSe <sub>2</sub>               | 1.51 | 1.45 | 1.91 | 1.08 | ZnI <sub>2</sub>                | 2.91 | 4.00  | 4.23  | 4.31 |
| XeF <sub>2</sub>               | 2.82 | 3.83 | 4.06 | 5.62 | ZnO                             | 0.73 | 3.17  | 2.77  | 3.81 |
| XeF <sub>3</sub>               | 2.64 | 3.69 | 4.25 | 5.59 | ZnP <sub>2</sub>                | 1.47 | 2.17  | 2.23  | 2.60 |
| XeF <sub>4</sub>               | 2.86 | 3.87 | 4.02 | 5.89 | ZnS                             | 1.21 | 2.51  | 2.38  | 2.88 |
| ZnS <sub>2</sub>               | 2.00 | 3.15 | 2.46 | 3.26 | ZrI <sub>2</sub>                | 0.30 | 2.08  | 1.84  | 2.13 |
| ZnSb                           | 0.08 | 0.82 | 0.63 | 1.12 | ZrI <sub>3</sub>                | 0.20 | 1.98  | 1.73  | 2.15 |
| ZnSe                           | 1.61 | 2.79 | 2.77 | 2.92 | ZrI <sub>4</sub>                | 2.01 | 3.66  | 2.28  | 3.15 |
| ZnTe                           | 1.08 | 1.72 | 1.73 | 2.26 | ZrO <sub>2</sub>                | 3.54 | 6.08  | 6.05  | 4.46 |
| Zr <sub>3</sub> N <sub>4</sub> | 1.27 | 3.48 | 3.26 | 2.79 | ZrS <sub>2</sub>                | 1.04 | 2.66  | 2.53  | 2.12 |
| ZrBr <sub>4</sub>              | 3.78 | 5.70 | 5.80 | 4.53 | ZrS <sub>3</sub>                | 1.09 | 2.70  | 2.59  | 2.20 |
| ZrCl <sub>2</sub>              | 0.86 | 3.25 | 2.95 | 3.36 | ZrSe <sub>2</sub>               | 0.34 | 1.97  | 1.77  | 1.56 |
| ZrCl <sub>3</sub>              | 0.54 | 2.95 | 2.61 | 3.25 | ZrSe <sub>3</sub>               | 0.56 | 2.17  | 1.99  | 1.75 |
| ZrCl <sub>4</sub>              | 3.62 | 5.81 | 5.84 | 4.88 | ZrTe <sub>5</sub>               | 0.08 | 1.06  | 1.02  | 1.66 |
| ZrF <sub>4</sub>               | 5.35 | 8.39 | 8.51 | 7.38 | ZrZn                            | 0.02 | 0.26  | 0.49  | 0.22 |
